1 Combined drought resistance strategies and the hydraulic limit in co-  
2 existing Mediterranean woody species

3 Asaf Alon<sup>1,2,3</sup>, Shabtai Cohen<sup>2</sup>, Regis Burllett<sup>4</sup>, Uri Hochberg<sup>2</sup>, Victor Lukyanov<sup>2</sup>, Ido  
4 Rog<sup>5</sup>, Tamir Klein<sup>5</sup>, Herve Cochard<sup>6</sup>, Sylvain Delzon<sup>4</sup> and Rakefet David-Schwartz<sup>1</sup>

5 <sup>1</sup>Institute of Plant Sciences, Volcani Center, Agricultural Research Organization,  
6 Rishon LeZion, Israel.

7 <sup>2</sup>Institute of Soil, Water and Environmental Sciences, Volcani Center, Agricultural  
8 Research Organization, Rishon LeZion, Israel.

9 <sup>3</sup>Institute of Plant Sciences and Genetics in Agriculture, The Robert H. Smith Faculty  
10 of Agriculture, Food and Environment, The Hebrew University of Jerusalem,  
11 Rehovot, Israel.

12 <sup>4</sup>Univ. Bordeaux, INRAE, BIOGECO, Pessac, France.

13 <sup>5</sup>Department of Plant and Environmental Sciences, Weizmann Institute of Science,  
14 Rehovot, Israel.

15 <sup>6</sup>Université Clermont Auvergne, INRAE, PIAF, 63000 Clermont-Ferrand, France

16

17 Corresponding Author: [rakefetd@volcani.agri.gov.il](mailto:rakefetd@volcani.agri.gov.il) +972-39683678

18 Total word count for the main body of the text: 6,058

19

20

## 21 **Summary**

- 22 • Woody species employ various strategies to cope with drought stress. We  
23 investigated similarities and differences in response to chronic drought to  
24 understand resistance strategies in co-occurring Mediterranean species.
- 25 • We studied five predominant Mediterranean species; *Quercus calliprinos*,  
26 *Pistacia palaestina*, *Pistacia lentiscus*, *Rhamnus lycioides*, and *Phillyrea*  
27 *latifolia* over two summers at three sites with different aridities. We measured  
28 key hydraulic and osmotic traits related to drought resistance, including  
29 resistance to embolism ( $\Psi_{50}$ ), carbon isotope signature ( $\delta^{13}\text{C}$ ), pre-dawn ( $\Psi_{\text{PD}}$ )  
30 and mid-day ( $\Psi_{\text{MD}}$ ) water potentials, and native ( $\Psi_s$ ) and full turgor ( $\Pi_0$ )  
31 osmotic potentials.
- 32 • Significant differences among species appeared in resistance to embolism. The  
33 species also showed differences in the water potential plastic response over the  
34 dry season. This interspecific variation increased at the end of the dry season  
35 and resulted in very narrow hydraulic safety margins (HSM). Consequently,  
36 predicted loss of hydraulic conductivity revealed species with significant  
37 native embolism. Two of the species also had seasonal changes in osmotic  
38 adjustment.
- 39 • Our detailed analysis indicates that co-existing Mediterranean woody species  
40 combine various drought resistance strategies to minimize mortality risk.  
41 However, all of them risk mortality as they approach their hydraulic limit near  
42 the dry margin of their distribution.

43

44

45 Key words: Climate change, Drought resistance, Hydraulic failure, Hydraulic safety  
46 margins, Osmotic adjustment, Tree hydraulics.

## 47 **Introduction**

48 Drought is projected to increase in intensity and duration in many regions  
49 worldwide, including the Mediterranean (Spinoni *et al.*, 2018; Xu *et al.*, 2019) a hot spot  
50 for biodiversity (Myers *et al.*, 2000). The current massive tree mortality in parts of the  
51 region is a major cause of concern for the extinction of native species (García de la  
52 Serrana *et al.*, 2015; Cramer *et al.*, 2018). Deciphering drought resistance strategies and  
53 their limitations in Mediterranean woody species is crucial for understanding changes in  
54 structure and function of plant communities threatened by climate change, and will help  
55 improve forests and woodlands' sustainable management programs (Trumbore *et al.*,  
56 2015).

57 The various strategies used by woody species to cope with drought stress can be  
58 divided into three categories; escape, avoidance and tolerance (Delzon, 2015; Volaire,  
59 2018). **Escape** is the temporary shedding of leaves and branches through which water is  
60 lost. **Avoidance** is actively minimizing water loss by stomatal closure or increasing water  
61 uptake through deep roots. **Tolerance** is maintaining physiological functionality during  
62 water loss, mainly by increased xylem resistance to embolism and osmotic adjustment to  
63 prevent turgor loss at the cell level. Woody species vary in their strategies to cope with  
64 drought, especially under natural conditions of prolonged and severe drought. Therefore,  
65 field studies of natural populations for a wide range of species and traits, and along  
66 aridity gradients, are necessary.

67 Drought can lead to embolism, a process that occurs via cavitation events in the  
68 xylem and causes hydraulic dysfunction by disrupting water conduction in the xylem  
69 (Tyree & Zimmermann, 1983). Embolism resistance is often expressed as the value of  
70 xylem water potential ( $\Psi_x$ ) corresponding to 50 or 88 percent loss of conductivity (PLC),  
71  $\Psi_{50}$  and  $\Psi_{88}$ , respectively (Tyree & Sperry, 1989). Embolism has been shown to be one  
72 of the leading causes of tree mortality worldwide (Anderegg *et al.*, 2016; Adams *et al.*,  
73 2017). The variation in embolism resistance between species is large, and it appears that  
74 species habitat dryness plays a significant role in this variation (Maherali *et al.*, 2004;  
75 Delzon *et al.*, 2010; Choat *et al.*, 2012; Larter *et al.*, 2017; Skelton *et al.*, 2018). As  
76 opposed to the large interspecific variation, it seems that intraspecific variation in  
77 resistance to embolism is limited. However, an analysis of 46 species suggests that  
78 significant intraspecific variation may occur (Anderegg, 2015).

79 Leaf water potential ( $\Psi$ ) is an indicator of plant water status. Pre-dawn leaf  $\Psi$   
80 ( $\Psi_{PD}$ ) is measured when the plant is in equilibrium with soil water, and is a measure of  
81 the soil water availability as perceived by the plant.  $\Psi_{PD}$  is affected by drought severity  
82 and root depth (Nardini *et al.*, 2016). The difference between either the  $\Psi_{50}$  or  $\Psi_{88}$  value  
83 and the minimum water potential observed in field conditions ( $\Psi_{min}$ ) is defined as the  
84 hydraulic safety margins (HSM) (Meinzer *et al.*, 2009; Martin-StPaul *et al.*, 2017). A  
85 narrow HSM means proximity to thresholds where there is a risk of hydraulic failure. A  
86 meta-analysis showed that most plants that resist drought do so by stomatal closure at a  
87 much higher water potential than that which causes hydraulic failure (Martin-StPaul *et al.*  
88 *et al.*, 2017). This suggests that species in nature avoid hydraulic failure by sacrificing  
89 photosynthesis (Meinzer *et al.*, 2009; Johnson *et al.*, 2011; Martin-StPaul *et al.*, 2017;  
90 Creek *et al.*, 2020).

91 Photosynthetic performance is usually measured in ecological studies through leaf  
92 carbon isotope discrimination,  $\delta^{13}C$  (Cernusak *et al.*, 2013). Leaf  $\delta^{13}C$  is used to assess  
93 leaf gas exchange characteristics in C3 terrestrial plants. It is commonly used as a proxy  
94 for intrinsic water use efficiency (WUEi), which is the ratio between carbon assimilation  
95 (A) and stomatal conductance (g). WUEi is considered an integrative, long-term  
96 evaluation of photosynthetic performance rather than an instantaneous measurement  
97 (Dawson *et al.*, 2002).

98 Stomatal closure has been shown to be correlated with the cell turgor-loss-point  
99 (TLP) (Mencuccini *et al.*, 2015; Bartlett *et al.*, 2016; Martin-StPaul *et al.*, 2017). To  
100 keep turgid cells, plants may invest energy to reduce the cell TLP during dehydration.  
101 The water potential for TLP ( $\Psi_{TLP}$ ) is reduced through active accumulation of solutes, i.e.  
102 osmotic adjustment (Bartlett *et al.*, 2012). The seasonal course leaf osmotic potential  
103 reveals the plasticity of osmotic adjustment as related to environmental changes (Bartlett  
104 *et al.*, 2012).

105 Studies focusing on leaf traits of co-existing woody species in Mediterranean  
106 climates reveal variation in response to drought during the long rainless summer. Leaf  
107 defoliation in response to extreme drought was observed in *Juniperus phoenicea*,  
108 *Rosmarinus officinalis*, and *Rhamnus lycioides* but not in four other co-existing species  
109 (Gazol *et al.*, 2017). Dehydration avoidance via stomatal closure at the cost of low carbon  
110 assimilation was demonstrated by *Pinus nigra*, while neighboring *Quercus ilex* and  
111 *Quercus faginea* showed dehydration tolerance via osmotic adjustment. The observed

112 osmotic adjustment was more robust in the evergreen *Q. ilex* than in the semi-deciduous  
113 *Q. faginea*, explaining its better resistance to drought (Forner *et al.*, 2018a). However, *Q.*  
114 *faginea* responded to intensified drought conditions by a more robust plastic stomatal  
115 response than *Q. ilex* (Klein *et al.*, 2013; Forner *et al.*, 2018b). Independent studies that  
116 measured  $\delta^{13}\text{C}$  agreed that pine exhibited better WUEi than co-existing oak species under  
117 prolonged drought or inter-annual precipitation differences. A significant variation in  
118 stomatal regulation, detected through  $\delta^{13}\text{C}$  and oxygen isotope composition in ten co-  
119 existing species in Spain, further emphasized the contrasting WUEi among species  
120 (Moreno-Gutiérrez *et al.*, 2012). Combined analysis of  $\Psi_{\text{PD}}$  and sap flow of five species  
121 allowed designating *Pinus halepensis*, *Pistacia lentiscus*, and *Erica multiflora* as water  
122 savers, versus *Quercus coccifera* and *Stipa tenacissima* as water spenders (Chirino *et al.*,  
123 2011).

124 The above studies imply interspecific differences in the plastic stomatal response  
125 or osmotic adjustment; however, resistance to embolism, a key trait in species resistance  
126 to drought, was missing from those studies. Large variation in resistance to embolism in  
127 Mediterranean climates was found among 19 fynbos species in South Africa (Pratt *et al.*,  
128 2012) and nine chaparral species of the Rhamnaceae in California (Pratt *et al.*, 2007)  
129 Both studies concluded that resistance to embolism is linked to the species' post-fire  
130 recruitment strategy. In a study conducting year-round measurements of resistance to  
131 embolism, water potential, and  $\Psi_{\text{TLP}}$  in three co-existing species (Väänänen *et al.*, 2019),  
132 it was found that *Phillyrea latifolia* tolerates drought via xylem resistance to embolism  
133 and osmotic adjustment, while co-existing *Pistacia lentiscus* and *Quercus calliprinos*  
134 avoid drought via stomatal regulation. However, these results did not explain the high  
135 mortality rate of *Q. calliprinos* compared to the other species, suggesting that an  
136 additional mechanism might occur in these co-existing species. This emphasizes the  
137 importance of evaluating a range of traits, species, and aridity gradients to represent  
138 better each species' total traits repertoire used for drought resistance.

139 Here, we tested the hypothesis that co-existing Mediterranean species differ in drought  
140 resistance strategies, however, all can respond to drought intensification through plastic  
141 traits. To this end, we studied five co-existing species at three sites with different aridity,  
142 one of which is near the dry margin of the species distribution. We measured predawn  
143 and midday water potentials during the dry season and  $\delta^{13}\text{C}$  at the end of the dry season,  
144 resistance to embolism at the end of the wet season, and native and full-turgor osmotic

145 potentials as related to midday water potential over the course of the dry season. The  
146 resulting data set allowed us to evaluate the response of co-existing species to prolonged  
147 drought.

148

## 149 **Materials and methods**

### 150 *Sites and species*

151 The steep climatic gradient in Israel is governed by Mediterranean weather patterns,  
152 characterized by long, dry summers, and changes gradually from mesic-  
153 Mediterranean to arid from north to south (Tielbörger *et al.*, 2014). Three sites were  
154 chosen to represent Mesic-Mediterranean (MM), Mediterranean (M) and Semi-arid  
155 (SA) climate conditions along the natural rainfall gradient (Table 1). The three sites  
156 were undisturbed for the last 40 years, and thus represent ecologically equilibrated  
157 environments. Climate data was taken from stations of the Israel Meteorological  
158 Service (IMS, [ims.gov.il](http://ims.gov.il)); station Michmanim for the MM site, station Ramat  
159 Hanadiv for the M site, and station Netiv HaLamed-Heh for the SA site. All sites  
160 were characterized by a prolonged summer-fall rainless dry period, from the end of  
161 April to October. Aridity indexes (mean annual precipitation divided by potential  
162 evapotranspiration) for the SA, M, and MM sites are 0.27, 0.39, and 0.46,  
163 respectively. Annual precipitation (from September to August) in 2017-2018 was 337,  
164 624, and 700 mm, and in 2018-2019 was 504, 651, and 1039 mm at the SA, M and  
165 MM sites, respectively. Temperature also differed along the climate gradient and  
166 average daily maximum temperature in the summer was 35°C, 32°C, and 29°C,  
167 respectively (Fig. **1a**). Maximum VPD in the summer ranged from 4 to 2.5 kPa from  
168 SA to M, respectively (Fig. **1b**). Soil types varied between the sites and the degree of  
169 clayey soil decreased from north to south. Five predominant native woody species  
170 were selected for the research (Table 2), which co-existed in 2,500 square meter plots  
171 at each of the three research sites. The SA site is close to the dry southern limit of the  
172 Mediterranean zone and the studied species (Supporting Information Fig. 1) (Danin &  
173 Plitmann, 1987).

174 For all trait measurements described below, samples were taken from specific five  
175 labeled individuals per species at each site, unless otherwise stated.

176

177 *Hydraulic vulnerability measurements*

178 Vulnerability curves (VC) for percent loss of conductivity (PLC) of stem samples as a  
179 function of water potential were measured in a Cavitron (Cochard, et al., 2005). This  
180 was done for all species except QC, which was not measured due to its long vessels (>  
181 30 cm, personal data). It was impossible to find QC branches 1 m long for  
182 measurements in a nonstandard Cavitron with a large rotor diameter. Thus, we  
183 measured the PLC values of *Quercus coccifera*, which is an evergreen oak that  
184 belongs to the subgenus *Quercus* section *Cerris* and is considered a subspecies of QC  
185 (Toumi & Lumaret, 2010).

186 To avoid native embolism in branches that were tested for VC and PLC, samples were  
187 collected from the three sites at the end of the rainy season (April 2018), when water  
188 potentials were less negative than -1.5 MPa. Samples of RL at the MM site were not  
189 included in this analysis, as its branches were too short for the Cavitron. Two terminal  
190 branches (1 cm diameter and 100 cm in length) were harvested from the upper canopy  
191 of 5-7 individuals of each species and were sent in overnight mail to France (to  
192 Bordeaux and Clermont-Ferrand). VC curves were determined as previously  
193 described (Lamy et al., 2014). PLC was calculated every 1-2 MPa, following the  
194 equation: [1]

$$195 \quad PLC = 100 * \left(1 - \frac{K}{K_{max}}\right)$$

196 The sigmoidal curve was fitted to the following equation (Pammenter & Van der  
197 Willigen, 1998):

$$198 \quad [2]$$

$$199 \quad PLC = \frac{100}{[1 + \exp(\frac{S}{25} * (\Psi - \Psi_{50}))]}$$

200 Where  $\Psi_{50}$  (MPa) is the xylem pressure inducing 50% loss of conductance and S (%  
201  $\text{MPa}^{-1}$ ) is the slope of the vulnerability curve at the inflection point. Predicted PLC  
202 ( $\text{PLC}_P$ ) was calculated according to the actual leaf water potential and Equation 2.

203

204 *Field measurements of water potential*



205 Field campaigns were conducted monthly at all sites during the rainless period (May -  
206 September) in two consecutive years; 2018, where predawn and midday water  
207 potentials were measured ( $\Psi_{PD}$  and  $\Psi_{MD}$ , respectively) and in 2019, where only  $\Psi_{MD}$   
208 was measured. The measurements were made in a Scholander-type pressure chamber  
209 (PMS, Corvallis, OR, USA). The decline in  $\Psi_{MD}$  in relation to soil dehydration (as  
210 reflected by  $\Psi_{PD}$ ) was analysed according to Meinzer et al. (2016). Regression lines  
211 were calculated for all species for each site. Slopes, Hydroscales (which is a metric of  
212 stomatal control based on the area between the 1:1 line and the regression slope), and  
213  $\Psi_{g0}$  (extrapolated to find the value at which  $\Psi_{PD} = \Psi_{MD}$ ) were calculated from the  
214 above analysis both for different sites for each species and for each species separately  
215 at all sites included (Supporting Information Table S8, S9).  $\Psi_{min}$  was taken as the  
216 lowest value of measured midday water potential in the field. Hydraulic safety  
217 margins (HSM) were calculated as  $\Psi_{min} - \Psi_x$ , where  $\Psi_x$  is the xylem pressure inducing  
218 12, 50 or 88% loss of branch hydraulic conductivity.

219

#### 220 *Leaf $\delta^{13}C$*

221 Carbon isotope ratio ( $\delta^{13}C$ ) was measured in mature healthy sunlit leaves collected at  
222 the end of the dry period (August 2018) with a  $^{13}C$  cavity ring down analyzer  
223 (G2131i, Picarro, Santa Clara, CA, USA) as described by Nemera et al. (2020). Leaf  
224 intrinsic water-use efficiency (WUE<sub>i</sub>) was calculated using the species mean based on  
225 a leaf-scale model of C3 photosynthetic isotope discrimination (Farquhar et al., 1989):

226

227 [4]

$$228 \quad WUE_i = \frac{C_a(b - \delta^{13}C)}{1.6(b - a)}$$

229

230 Where  $C_a$  is the atmospheric CO<sub>2</sub> concentration in PPM and a and b are fractionation  
231 factors occurring during diffusion of CO<sub>2</sub> through stomata pores (4.4‰) and  
232 enzymatic carbon fixation by Rubisco plus a small component accounting for  
233 mesophyll conductance (27‰), respectively.

234



235 *Osmotic potential*

236 Leaf samples in which water potential was measured were frozen in liquid nitrogen  
237 for native osmotic potential ( $\Psi_s$ ) measurements. For full turgor osmotic potential ( $\Pi_0$ )  
238 measurements, an additional shoot, harvested from each individual, was cut under  
239 water, rehydrated for 2 hours, and measured in the pressure chamber to verify  
240 rehydration. For both cases ( $\Psi_s$  and  $\Pi_0$ ), samples were packed into 250  $\mu$ l tubes and  
241 were frozen in liquid nitrogen. Upon thawing, holes were drilled in the bottom of the  
242 frozen tubes, which were then put into other clean tubes that collected the liquid when  
243 centrifuged at 15000 RCF (g) for 2 min. Ten microliters from each Osmolality  
244 (mmol) of the samples was assessed with a vapor-pressure osmometer (VAPRO 5520  
245 Wescor, Logan, UT). Conversion to pressure units was done by Van't Hoff equation:

246

247 [5]

$$248 \quad \Psi_{\pi}(\text{MPa}) = nRT/10000$$

249 in which n is the solute concentration in mol/L, R is the universal gas constant  
250 ( $8.314472 \text{ L bar K}^{-1} \text{ mol}^{-1}$ ), and T is the temperature in  $^{\circ}\text{K}$ . Temperature was taken as  
251  $25^{\circ}$ ; conversion ratio was 403.33 mmol/MPa.

252  $\Psi_s$  and  $\Pi_0$  were analyzed by correlation with the  $\Psi_{\text{MD}}$  values, and by covariance  
253 analyses which were performed to test the influence of  $\Psi_{\text{MD}}$ , site, and the interaction  
254 between  $\Psi_{\text{MD}}$  and site on  $\Psi_s$  and  $\Pi_0$ . Slope regression analysis of  $\Psi_s$  Vs.  $\Psi_{\text{MD}}$  is a  
255 proxy for the osmotic potential due to both cell shrinkage and osmotic adjustment  
256 (OA, i.e., active solute accumulation). Slope regression analysis of  $\Pi_0$  Vs.  $\Psi_{\text{MD}}$  is a  
257 proxy for OA only.

258

259 *Species characterization by drought-resistance strategies*

260 Tolerance and Avoidance were quantified as numbers between 0 and 100 (less to  
261 most, respectively) for each species. Each strategy was evaluated from the below  
262 measured parameters which were converted to normalized values (NV) as follows:

$$263 \quad \text{NV} = (x - \text{min}) / (\text{max} - \text{min}) \quad [6]$$

264 Where x is the measured value, and min and max are the minimum and maximum  
265 thresholds of each parameter.

266 **"Tolerance"** refers to "Xylem tolerance", and was taken to be a normalized value of  
267  $\Psi_{50}$ . Values for normalization were from 0 to -18 MPa, the latter being the most  
268 negative  $\Psi_{50}$  reported (Larter et al., 2015).

269 **"Avoidance"** was calculated as the average of "Water access", "Stringency of  
270 stomatal control", and "Osmoregulation". "Water access" was normalized from the  
271 minimum seasonal  $\Psi_{PD}$  at the SA site. Values for normalization were from 0 to -10  
272 MPa. Normalized values were subtracted from 1. "Stringency of stomatal control"  
273 was normalized from Hydroscares (HS), calculated from  $\Psi_{PD}$  vs.  $\Psi_{MD}$  according to  
274 Meinzer et al. (2016), where the full range of values was from 0 to 10 MPa.  
275 Normalized values were subtracted from 1. "Osmoregulation" was normalized from  
276 the slope of  $\Psi_{MD}$  vs.  $\Pi_0$ . Values for normalization were from 0 to 1.

277 **"Escape"** was the rank for "Drought-deciduous". "Drought-deciduous" was evaluated  
278 from the literature (1, 0.5, and 0, refer to full-, partial-, and non- deciduous,  
279 respectively). Among the studied species, only RL is known to be partially drought-  
280 deciduous (Gazol et al., 2017).

281

## 282 *Statistical Analysis*

283 Analysis of variance (ANOVA) was used (Python software, Python Software  
284 Foundation; JMP 14 software, SAS Institute Inc., Cary, NC, USA) to identify  
285 significant differences between species and sites. The Tukey-Kramer post hoc test  
286 was used to compare the results. Data fitting was carried out using Python software.  
287 Bartlett's test for homogeneity of variances, using JMP 14 software was used to  
288 compare interspecific variation among sites and along the season within sites.  
289 Analysis of co-variance was used to test influence of both site and  $\Psi_{MD}$  on  $\Pi_0$  and  $\Psi_s$ ,  
290 and also used to test influence  $\Psi_{PD}$  and site on  $\Psi_{MD}$ .

291

## 292 **Results**

### 293 *Effect of environmental drought on hydraulic traits*

294 **Resistance to embolism** – Large differences in resistance to embolism were found  
295 between species, with the highest  $\Psi_{50}$  for PP (~ -5 MPa) and lowest for PHL (< -10  
296 MPa). All parameters of vulnerability curves for resistance to embolism per species,

297 including slope,  $\Psi_{12}$ ,  $\Psi_{50}$ , and  $\Psi_{88}$ , were similar at the three sites (Fig. 2, Table 3,  
298 Supporting Information Tables S1-S6), and were not influenced by the site, as shown  
299 by a two-factorial ANOVA (Table 3).

300 **Leaf water potential** - Minimum  $\Psi_{MD}$  was found at the end of the season at the SA  
301 site. For QC and PHL minimum values were close to, but did not decline below  $\Psi_{12}$ ,  
302 while for the other species minimum  $\Psi_{MD}$  values were significantly lower than  $\Psi_{12}$   
303 (Fig. 3). Significant differences in  $\Psi_{PD}$  between sites for each of the species were  
304 found in each sampling along the dry season (Fig. 3, Supporting Information Table  
305 S7). A strong influence of site on  $\Psi_{PD}$  was found at the beginning and end of the dry  
306 season (Table 3).  $\Psi_{PD}$  was more negative at the SA than at the MM and M sites (Fig.  
307 3a-e, Supporting Information Table S7).  $\Psi_{min}$  was significantly influenced by site in  
308 both 2018 and 2019 (Table 3, Fig. 3f-g).

309 **HSM and PLCp** – The HSM in 2018 was narrower at the SA site than at the M and  
310 MM sites for three of the species, while the other two species had narrower HSM's at  
311 the SA and M site in comparison to the MM site (Fig. 4a,b, Supporting Information  
312 Tables S1, S3, S5). These differences were less prominent in 2019 (Fig. 4d,e,  
313 Supporting Information Tables S2, S4, S6). Values of HSM<sub>50</sub> less than 1 MPa were  
314 found at the SA site in 2018 (for PP and RL, Supporting Information Table S1), and the  
315 predicted PLC (PLCp) for those species reached values of 30% or more (Fig. 4). In both  
316 2018 and 2019 HSM<sub>12</sub> declined to negative values at the SA site (Fig. 4a,e, Supporting  
317 Information Tables S3, S4). The calculated HSM of  $\Psi_{12}$ ,  $\Psi_{50}$ , and PLCp were affected  
318 by site in 2018, but not in 2019, which was a wetter year (Table 3, Fig. 1).

319 **Carbon-water balance** - Leaf  $\delta^{13}C$  and its derivative WUE<sub>i</sub> was higher at the drier  
320 site than at the wetter sites. Differences were significant for two of the species (Fig.  
321 5). The site influence on leaf  $\delta^{13}C$  was significant in the two-factorial ANOVA (Table  
322 3).

323 **Osmotic potential** - Changes in osmotic potential were significant for all the species  
324 along the dry season, in relation to the decline in  $\Psi_{MD}$  (Fig. 6 f-j, Table S14).  
325 Covariance analysis for  $\Psi_s$  revealed a significant site effect only for PL, and a  
326 significant  $\Psi_{MD}$  effect for all species (Supporting Information Table S14). Osmotic  
327 adjustment differed substantially among species, being large in PHL and QC and  
328 minor in RL (which was expressed in significant  $\Psi_{MD}$  effect) negligible in PL, and

329 nonexistent in PP (Fig. **6f-j**, Supporting Information Table S10). Covariance analysis  
330 for  $\Pi_0$  revealed a significant site effect only for PL and PHL (Supporting Information  
331 Table S15).

332 Accordingly, most of the reduction in  $\Psi_s$  during the dry season in QC is from active  
333 osmolyte accumulation, while in PL, PP and RL most of the reduction is due to cell  
334 shrinkage. PHL seems to retain both mechanisms.

335

336 *Species comparison by trait*

337 **Resistance to embolism** - Resistance to embolism, expressed by  $\Psi_{50}$  (Fig. **2**),  $\Psi_{12}$ ,  
338 and  $\Psi_{88}$ , showed interspecific variation at the SA and M sites (Table 3, Supporting  
339 Information Tables S1-S6). PHL demonstrated the most negative values followed by  
340 RL and PL, while PP showed the least negative value.

341 **Water potential** - Interspecific variations were evidenced at each site, and at each  
342 measurement event (Supporting Information Tables S11, S12). PHL had the most  
343 negative  $\Psi_{PD}$ , followed by RL and PL, while QC and PP had the highest  $\Psi_{PD}$  values  
344 (Fig. **3a-e**). Two-factorial ANOVA showed that  $\Psi_{min}$ , which is the lowest  $\Psi_{MD}$  value  
345 at the end of the dry season, was affected by the species and site. However, it was  
346 affected by the interaction of species-on-site only in 2018 (Table 3).

347 A comparison of the interspecific variation among sites using Bartlett's test for  
348 homogeneity of variances, resulted in a significant difference ( $P = 0.0259$ ) between  
349 sites at the beginning of the dry season. Interspecific variation was evidenced at the  
350 SA site more than at the M and MM sites (Table 4). The rest of the sampling dates did  
351 not show a significant difference in interspecific variation between sites; however, the  
352 SA site had higher values than the M and MM sites (Table 4).

353 Species showed different evolution of  $\Psi_{PD}$  along the dry season, and reached different  
354 values at the end of the season (Fig. **3a-e**). In each site, the interspecific variation  
355 increased during the dry season (Table 4), however, a comparison of the variations  
356 along the season at the different sites (using Bartlett's test) found a significant ( $P =$   
357  $0.0258$ ) increase in interspecific variation only at the M site (Table 5). Slopes of  $\Psi_{PD}$   
358 along the dry season were different between species in each site, while the higher

359 value was that of RL and PHL, followed by PL, PP, and QC (Supporting Information  
360 Table S18).

361 **HSM** – Similar to  $\Psi_{PD}$ , the HSM of  $\Psi_{50}$ ,  $\Psi_{12}$ , and  $\Psi_{88}$  showed interspecific variation  
362 (Tables 3, Supporting Information Tables S1-S6). PP (at SA and M sites) and RL (at  
363 SA site) had a very narrow HSM, i.e. less than 1MPa (Fig. 4). However, in 2019,  
364 which was a wetter year (Fig. 1), the HSM of all species was wider than in 2018. In  
365 2018, the HSM based on  $\Psi_{12}$  at the SA site reached negative values for all species,  
366 except for QC, which had  $0.02 \pm 0.21$  MPa (Fig. 4a, Supporting Information Table S3).  
367 In 2019, negative HSM values for  $\Psi_{12}$  were recorded only for PP and RL at all sites  
368 (Fig. 4d, Supporting Information Table S4).

369 **Carbon-water balance** - One-way ANOVA suggested differences between species in  
370 leaf  $\delta^{13}C$  and  $WUE_i$  per site ( $P = 0.0682$ , Table 3, Supporting Information Table  
371 S13). A comparison of the interspecific variation among sites using the Bartlett's test  
372 suggested a strong tendency to significance ( $P = 0.0693$ ), with the MM site showing  
373 the highest interspecific variation, while SA and M sites showed reduced variation  
374 (Table 4). These results were attributed to PHL and QC, which had significant  
375 differences in leaf  $\delta^{13}C$  between sites (Fig. 5a).

376 **Osmotic potential** - Osmotic potential differed significantly between species in  $\Psi_s$   
377 and  $\Pi_0$  (Table 3). In addition, significant differences between species were revealed  
378 by covariance analysis for the different species at different sites (Supporting  
379 Information Tables S16, S17).

380

### 381 *Correlation between traits*

382 **The relationships between  $\Psi_{PD}$  and  $\Psi_{MD}$**  - Analysis of the various sites for each  
383 species showed that the slopes at the drier sites (M and SA) were steeper than the  
384 slope at the M site, except for QC. However, covariance analysis did not show  
385 significant differences between the slopes, except for PL. Hydroscape values for all  
386 species were always larger at the SA site than at the two wetter sites (Fig. 3f-j,  
387 Supporting Information Table S8, S19). Analysis which includes the data from the  
388 various sites for each species showed that slopes ranged from 0.83 for QC to 0.68 for  
389 RL (Supporting Information Table S9). For QC and PP, the extrapolated values were  
390 several MPa lower than the lowest data points, -8.9 and -8.7 MPa, respectively.

391 However, for PHL, RL and PL the lowest points were close to the regression values at  
392 equality, -8.7, -7.6, and -7.1 MPa, respectively (Supporting Information Table S9).  
393 Hydroscape values were 10.7, 9.15, 7.31, 6.31, and 3.52 MPa<sup>2</sup>, for RL, PHL, PL, PP,  
394 and QC, respectively (Table S9).

395

#### 396 *The relationships between osmotic parameters and $\Psi_{MD}$*

397 For all species significant linear correlations were found between osmotic potential,  
398  $\Psi_s$ , and  $\Psi_{MD}$  along the season (Fig. **6a-e**). The effect of  $\Psi_{MD}$  on  $\Psi_s$  was evident for all  
399 species, while a site effect was found only for PL (Supporting Information Table  
400 S14). A linear correlation was also found between  $\Pi_0$  and  $\Psi_{MD}$  (Fig. **6f-j**, Supporting  
401 Information Table S10), while only QC, PHL, and RL had a  $\Psi_{MD}$  effect on  $\Pi_0$   
402 (Supporting Information Tables S15). There was evidence for a site effect on  $\Pi_0$  for  
403 PHL and PL, while no effect for the interaction of  $\Psi_{MD}$  with site was revealed for any  
404 of the species (Supporting Information Table S15). The largest osmotic adjustment  
405 was observed for PHL, and ranged from -2 to -5 MPa along the dry season, with  
406 similar responses at all sites (Fig. **6j**). Osmotic adjustment for QC ranged from -2 to -  
407 3 MPa during the dry season, mostly at the M and SA sites (Fig. **6f**). A weak, but  
408 significant, osmotic adjustment was observed for PL and RL at the SA site (Fig. **6g-i**,  
409 Supporting Information Table S10).

410

#### 411 *Species characterization by drought-resistance strategies*

412 The results described above allowed the assessment of drought resistance strategies  
413 for each of the studied species (Fig. **7**). That was achieved by quantifying tolerance,  
414 avoidance, and escape strategies, as described in the Material and Methods  
415 (Supporting Information Table S19). Thus, we found that extreme resistance to  
416 embolism confers tolerance in PHL, which also uses osmotic adjustment to resist  
417 drought. Osmotic adjustment is a major trait in QC, which probably has deep roots to  
418 access water, supporting its stomatal opening during drought. PL and RL do not use  
419 osmotic regulation but have intermediate values of resistance to embolism and almost  
420 complete stomatal closure. PP has low resistance to embolism and no osmotic  
421 regulation, but its continued water uptake along the dry season suggests it has deep  
422 roots. RL is known to escape drought by partial leaf defoliation (Gazol et al., 20017).

## 423 **Discussion**

424 The resulting data set of the current study, in addition to known species-specific  
425 characteristics, demonstrated that co-existing Mediterranean species minimize  
426 mortality risk by combining drought resistance strategies. The results support the  
427 hypothesis that regulation of water potential is a result of a robust plastic response,  
428 while resistance to embolism is a fixed rigid trait that is not affected by site aridity.  
429 These characteristics led to a decline in the HSM with increasing drought intensity  
430 leading to negative HSM in several cases and suggesting hydraulic failure at the dry  
431 SA site.

432

### 433 *Relating environmental factors to phenotype*

434 The large data set provided by this study, encompassed three aspects of environmental  
435 drought, including site aridity, seasonal drought, and inter-annual climate differences.  
436 While all site characteristics were less favorable at the SA site than at the two wetter  
437 sites, precipitation and VPD differed the most, and actually played major roles in  
438 determining the drought intensity of the site. The rainless summer, together with the  
439 inter-annual precipitation differences, further emphasized the stress intensity that the  
440 studied species confronted. The SA site differed significantly from the other two sites  
441 for most of the traits, suggesting that species were closer to their physiological limits  
442 at the dry edge. The latter is in agreement with Feng, et al. (2019) and Guo, et al.  
443 (2020) who emphasized that temporal and spatial variability in the environment is  
444 important in determining plant response to drought, as opposed to characterization of  
445 species without considering environmental influences.

446 Our results show interspecific variation in resistance to embolism (Fig. 2). However,  
447 no intraspecific variation was evident for this trait. A lack of intraspecific variation is  
448 in agreement with previous studies that showed similar resistance to embolism in  
449 distantly separated populations (Martínez-Vilalta et al., 2009; Lamy et al., 2014;  
450 González-Muñoz et al., 2018; Lobo et al., 2018; Li et al., 2019; Bittencourt et al.,  
451 2020). However, although the three tested sites differ in climate characteristics, the  
452 lack of intraspecific variation might also be due to the continuous geographical  
453 distribution of the tested species (Figure S1), which prevented differentiation between  
454 populations due to continuous gene flow. In addition, it is possible that other remote



455 populations, which were not included in the current study, do possess intraspecific  
456 variation in resistance to embolism. Several studies have reported intraspecific  
457 variation in resistance to embolism in angiosperms. Examples are *Cordia alliodora*,  
458 *Artemisia tridentata*, *Fagus sylvatica*, *Populus trichocarpa*, and in Mediterranean and  
459 chaparral shrubs (Kolb & Sperry, 1999; Sparks & Black, 1999; Choat et al., 2007;  
460 Wortemann et al., 2011; Pratt et al., 2012; Jacobsen et al., 2014; Stojnić et al., 2017).

461 As opposed to the stability of resistance to embolism, the stomatal response was very  
462 plastic as reflected in changes in leaf water potential ( $\Psi_{PD}$  and  $\Psi_{MD}$ ) in response to  
463 drought in all species in relation to site aridity, seasonality, and inter-annual climate  
464 differences (Fig. 3, Table 3). The difference between species in the  $\Psi_{PD}$  slope along  
465 the season, especially at the SA site (Fig. 3, Table S18), suggests species  
466 differentiation in the degree of plasticity, where RL and PHL showed the strongest,  
467 and QC showed the least plastic response. The interspecific variation in  $\Psi_{PD}$  seemed  
468 to increase with drought and along the dry season, i.e., it was inversely related to  
469 aridity (Tables 4, 5).

470 The hydroscares (HS, Supporting Information Tables S8, S9), which showed  
471 differences between species, can be used as proxies for stringency of stomatal  
472 regulation (Meinzer et al., 2016). They gave a nearly mirror image of plasticity, where  
473 QC had the most stringency of stomatal regulation, while PHL and RL had the least  
474 stringency (Fig. 3, Supporting Information Tables S8, S9).

475 Variations in  $\Psi_{PD}$  and its plasticity between species along the dry season may reflect  
476 differences in root depth, where  $\Psi_{PD}$  of more deeply rooted species, such as QC,  
477 appears high with weak plasticity along the season (Crombie et al., 1988). Roots of  
478 five meter depth have been reported for PP (Jakoby et al., 2020), and QC (Canadell et  
479 al., 1996). Co-existing species with different root depths sustain niche segregation to  
480 share soil water resources (Palacio et al., 2017). Niche segregation has been shown in  
481 Mediterranean-type ecosystems through the leaf life span and  $\Psi_{min}$  as "anchor traits"  
482 among different morphological traits used to distinguish contrasting strategies of  
483 drought tolerance vs. avoidance (Ackerly, 2004). Our study, which focused on  
484 embolism resistance and leaf water potential, also suggests niche segregation in  
485 Mediterranean species. Another approach to exploring niche segregation divides  
486 species by different water use patterns (Redtfeldt & Davis, 1996), which has been

487 recently shown to be important in increasing forest productivity and the carbon sink in  
488 semi-arid regions (Rog et al. 2021). Our study suggests that niche segregation is  
489 sustained under different drought conditions.

490

491 *The dearth of hydraulic safety margins near the dry edge of species distribution*

492 The value of  $\Psi_L$  for complete stomatal closure ( $\Psi_{g_0}$ ) for QC and PP was more than 1  
493 MPa lower than  $\Psi_{min}$ , while for PL, RL and PHL  $\Psi_{min}$  was close to  $\Psi_{g_0}$  (Fig. **3f-j**).

494 The proximity of the minimum  $\Psi_{PD}$  to  $\Psi_{g_0}$  at the SA site indicates that these plants  
495 approached the point of null activity, which corresponds with the large reduction in  
496  $\Psi_{PD}$  across sites, as shown in Fig. **3**.

497 The  $\Psi_{50}$  HSM seemed to change according to annual precipitation (MAP, Fig. **4**),  
498 especially at the SA site, suggesting that a drought year would have more impact on  
499 species vulnerability. This is in agreement with Ziegler et al. (2019), who showed that  
500 for tropical trees the  $\Psi_{50}$  HSM became narrower, but still positive, in dry years. In the  
501 current study, all species (except for QC) crossed the  $\Psi_{12}$  threshold (Fig. **3f-j**) and  
502 some degree of difference between  $\Psi_{PD}$  and  $\Psi_{MD}$  remained, suggesting that species  
503 maintain some stomatal opening when embolism is low. Interestingly, PP had a  
504 negative  $\Psi_{12}$  HSM in all sites in both years (Fig. **4**), emphasizing the trade-off  
505 between hydraulic safety and carbon assimilation in this winter-deciduous species. In  
506 addition, results of predicted PLC (PLCp, Fig. **4c,f**) suggest that all species  
507 experienced embolism, which increased with drought intensity. These results suggest  
508 that species approach the limit of hydraulic capacity at the site near the dry margins of  
509 their distribution.

510 Evidence for embolism of stem xylem in nature is rare. Johnson et al. (2018) recently  
511 reported measurements implying that negative HSM's in *Quercus fusiformis* and  
512 *Prosopis glandulosa* occurred during the most severe drought in recorded history in  
513 central Texas. Fontes et al. (2018) found negative HSMs in *Eschweilera cyathiformis*  
514 and *Pouteria anomala* that experienced extreme drought during the strong El Niño  
515 that occurred across Amazonia in 2015–2016. The two above reports resulted from  
516 extreme climate events, while the species in our study seem to confront severe  
517 drought every year. Recent studies on *Prunus ramonensis* and *Pyrus syriaca* also  
518 reported potential embolism in nature (Paudel et al., 2019a; Paudel et al., 2019b).

519 Taking a modeling approach, Benito et al. (2018) use minimum soil water potential  
520 data and HSMs of 44 European woody species and found that negative HSMs explain  
521 the mortality of 15 species at the driest margins of their distribution.

522

### 523 *Interspecific variation in response to drought*

524 The interspecific variation in  $\Psi_{PD}$  increased with aridity and along the dry season  
525 (Tables 4, 5). This difference was supported by the significant effect of the species-  
526 by-site interaction on  $\Psi_{PD}$  (Table 3). However, this effect appeared only at the  
527 beginning of the dry season, where species operate at their relatively maximal  
528 physiological activity. As drought progressed, species reached minimum water  
529 potential, at which time the effect of site on differences was not significant.

530 The  $\Psi_{PD}$  results were supported by the leaf  $\delta^{13}C$  values that increased with site aridity,  
531 suggesting an increase in  $WUE_i$  (Fig. 5) (Farquhar et al., 1989). Similar results were  
532 obtained by Rumman et al. (2018), who found a negative correlation between MAP  
533 and  $WUE_i$  for precipitation up to 1000 mm/year, above which the trend flattened,  
534 indicating that isotopic discrimination in wet environments remained nearly constant.

535 The current study shows that the interspecific variation in leaf  $\delta^{13}C$  tends to be larger  
536 at the MM site than at the M and SA sites (Table 4). This result suggests that genetic  
537 variation in carbon assimilation rate is more pronounced in environmental conditions  
538 favoring high stomatal conductance, as compared to the M and SA sites. It also  
539 suggests that species under severe environmental drought, that demonstrate different  
540 plasticity, reach similar minimum rates of carbon assimilation (Fig. 5). This is in  
541 agreement with Forner et al. (2018b), who showed that the interspecific variation in  
542 leaf  $\delta^{13}C$  in three woody Mediterranean species in two consecutive wet years was  
543 reduced after an extremely dry year. Together, these results encourage the  
544 measurement of interspecific variation in carbon assimilation rates in wet rather than  
545 dry environments. Furthermore, high versus low interspecific variation in leaf  $\delta^{13}C$   
546 could be a proxy for evaluating water stress in multi-species ecological niches.

547 As all the species in our study suffered from severe drought at the SA site, as  
548 manifested in a significant reduction in HSM's, not all showed osmotic adjustment,  
549 suggesting that this mechanism is species dependent. Osmotic adjustment in drought  
550 has been reported for PHL (Serrano *et al.*, 2005), and is also well known in Olive

551 species, which are related to PHL (*Oleaceae* family) (Lo Gullo & Salleo, 1988; Sofu  
552 *et al.*, 2008). It has also been found in *Quercus* species (Deligö & Bayar, 2018;  
553 Aranda *et al.*, 2020) but not in QC (as far as we know), and in PL (Álvarez *et al.*,  
554 2018) only in response to salinity.

555 The low degree of osmotic adjustment in RL and nonexistent osmotic adjustment in  
556 PP may also be related to their deciduous nature, and may result from a strategy of  
557 allocating fewer resources to the leaf, similar to the findings of Liu *et al.* (2011) who  
558 showed higher capacities of osmotic adjustment in evergreen shrubs than in deciduous.

559

## 560 **Conclusions**

561 As illustrated in Figure 7, each of the co-occurring species in our study combines  
562 drought-resistance strategies to minimize the risk of mortality. However, all  
563 approached the limit of their hydraulic capacity at the site near the dry margins of  
564 their distribution. The hydraulic limit was more pronounced in the drier year,  
565 suggesting that a slight reduction in precipitation is more likely to put species at the  
566 dry margins of their distribution at the risk of mortality.

567

## 568 **Acknowledgments**

569 We acknowledge the Ramat Hanadiv team for their administrative expertise and  
570 technical assistance. We thank Rotem Attias, Shai Tamari, Feng-Feng and Junzhou  
571 Liu for their help in the fieldwork. We thank Gaëlle Capdeville for assisting in the  
572 Cavitron measurements. We thank Hillary Voet for her statistical advice. We thank  
573 the three anonymous referees for providing useful comments, which improved the  
574 article. This work was supported by the Ministère des Affaires Etrangères et du  
575 Développement International (France) and the Ministry of Science (Israel), under the  
576 Research Program "Maïmonide-Israel" to RDS, SD, SC and HC.

## 577 **Author Contribution**

578 AA, RDS, SC, SD, and HC designed experiments and interpreted data. AA, RB, and  
579 VL collected and measured field samples. AA and RB performed vulnerability curves  
580 measurements. AA and IR performed carbon isotope measurements. AA analyzed all  
581 data. AA, SC, and RDS co-wrote the manuscript with contributions from SD, HC,  
582 UH, and TK.

583 **Table 1:** Three selected sites with main geographical, edaphic, and climatic  
 584 characteristics.

| Code Site | *AI  | Latitude | Longitude | Elevation (m) | MAP * (mm) | SMT *(°C) | WMT *(°C) | Soil type**        |
|-----------|------|----------|-----------|---------------|------------|-----------|-----------|--------------------|
| MM        | 0.46 | 32°54'N  | 35°20'E   | 430           | 700        | 30        | 10        | TR                 |
| M         | 0.39 | 32°33'N  | 34°56'E   | 80            | 550        | 32        | 16        | TR and R           |
| SA        | 0.27 | 31°40'N  | 34°56'E   | 300           | 400        | 31        | 17        | Bright and Brown R |

585 \* AI, Aridity Index is the ratio of the annual precipitation and potential evapotranspiration.  
 586 MAP, mean annual precipitation; SMT, Average maximum daily temperature in July; WMT,  
 587 Average maximum daily temperature in January. \*Data for 1981–2000, provided by the Israel  
 588 Meteorological Service. \*\* Data taken from GIS site of Israel Agriculture office  
 589 (<https://moag.maps.arcgis.com/>), TR and R correspond to Terra Rossa and Rendzina,  
 590 respectively.  
 591

592

593 **Table 2:** Characteristics of species selected for the research.

| Species                    | Code | Family        | Life form  | Leaf phenology              |
|----------------------------|------|---------------|------------|-----------------------------|
| <i>Quercus calliprinos</i> | QC   | Fagaceae      | Tree       | Evergreen                   |
| <i>Pistacia palaestina</i> | PP   | Anacardiaceae | Shrub/Tree | Winter-deciduous            |
| <i>Pistacia lentiscus</i>  | PL   | Anacardiaceae | Shrub      | Evergreen                   |
| <i>Rhamnus lycioides</i>   | RL   | Rhamnaceae    | Shrub      | Partially drought-deciduous |
| <i>Phillyrea latifolia</i> | PHL  | Oleaceae      | Shrub      | Evergreen                   |

594

595

596

**Table 3:** Two-factorial ANOVA of the effect of species, site and the interaction between site and species on all measured traits. For all embolism resistance parameters the 2 factors analysis was done on four species (PL, PP, PHL, and RL) for two sites (M and SA). For the other parameters, analysis was done on four species (QC, PL, PP, and PHL) for three sites. Bold P values indicate statistically significant result.

| Trait                      | Species                                  | Site                                    | Species*Site                            |
|----------------------------|------------------------------------------|-----------------------------------------|-----------------------------------------|
| $\Psi_{50}$                | F(3,19)=84.5056<br><b>,P=&lt;0.0001</b>  | F(1,19)=0.4501<br>,P=0.508              | F(3,19)=1.4025<br>,P=0.2636             |
| $\Psi_{12}$                | F(3,19)=17.4657<br><b>,P=&lt;0.0001</b>  | F(1,19)=0.0105<br>,P=0.919              | F(3,19)=0.6733<br>,P=0.5759             |
| $\Psi_{88}$                | F(3,19)=27.4226<br><b>,P=&lt;0.0001</b>  | F(1,19)=0.719<br>,P=0.4039              | F(3,19)=0.1714<br>,P=0.9148             |
| Slope                      | F(3,15)=0.6424<br>,P=0.5944              | F(1,15)=0.0095<br>,P=0.9229             | F(3,15)=0.9251<br>,P=0.442              |
| $\Psi_{min}$ (2018)        | F(3,75)=84.7131<br><b>,P=&lt;0.0001</b>  | F(2,75)=68.5311<br><b>,P=&lt;0.0001</b> | F(6,75)=4.9622<br><b>,P=0.0003</b>      |
| $\Psi_{min}$ (2019)        | F(3,39)=92.7639<br><b>,P=&lt;0.0001</b>  | F(2,39)=19.4777<br><b>,P=&lt;0.0001</b> | F(6,39)=2.0137<br>,P=0.087              |
| Leaf $\delta^{13}C$ / WUEi | F(3,33)=2.4531<br>,P=0.0806              | F(2,33)=22.3469<br><b>,P=&lt;0.0001</b> | F(6,33)=1.3517<br>,P=0.2629             |
| PLCp (2018)                | F(3,75)=61.1677<br><b>,P=&lt;0.0001</b>  | F(2,75)=13.0761<br><b>,P=&lt;0.0001</b> | F(6,75)=8.4556<br><b>,P=&lt;0.0001</b>  |
| PLCp (2019)                | F(3,39)=62.9183<br><b>,P=&lt;0.0001</b>  | F(2,39)=9.6769<br><b>,P=0.0004</b>      | F(6,39)=6.3173<br><b>,P=0.0001</b>      |
| HSM <sub>12</sub> (2018)   | F(3,75)=109.954<br><b>,P=&lt;0.0001</b>  | F(2,75)=57.7828<br><b>,P=&lt;0.0001</b> | F(6,75)=10.5175<br><b>,P=&lt;0.0001</b> |
| HSM <sub>12</sub> (2019)   | F(3,75)=110.3402<br><b>,P=&lt;0.0001</b> | F(2,75)=48.928<br><b>,P=&lt;0.0001</b>  | F(6,75)=10.6456<br><b>,P=&lt;0.0001</b> |
| HSM <sub>50</sub> (2018)   | F(3,75)=111.7792<br><b>,P=&lt;0.0001</b> | F(2,75)=40.8695<br><b>,P=&lt;0.0001</b> | F(6,75)=11.3523<br><b>,P=&lt;0.0001</b> |
| HSM <sub>50</sub> (2019)   | F(3,39)=87.4207<br><b>,P=&lt;0.0001</b>  | F(2,39)=17.8401<br><b>,P=&lt;0.0001</b> | F(6,39)=5.0945<br><b>,P=0.0006</b>      |
| HSM <sub>88</sub> (2018)   | F(3,39)=88.1662<br><b>,P=&lt;0.0001</b>  | F(2,39)=14.9253<br><b>,P=&lt;0.0001</b> | F(6,39)=5.0271<br><b>,P=0.0007</b>      |
| HSM <sub>88</sub> (2019)   | F(3,39)=89.8414<br><b>,P=&lt;0.0001</b>  | F(2,39)=12.7135<br><b>,P=&lt;0.0001</b> | F(6,39)=5.5257<br><b>,P=0.0003</b>      |
| $\Psi_{PD}$ (Sep_2018)     | F(3,74)=73.7787<br><b>,P=&lt;0.0001</b>  | F(2,74)=39.6804<br><b>,P=&lt;0.0001</b> | F(6,74)=2.3523<br><b>,P=0.0391</b>      |
| $\Psi_{PD}$ (May_2018)     | F(3,32)=17.1726<br><b>,P=&lt;0.0001</b>  | F(2,32)=85.8451<br><b>,P=&lt;0.0001</b> | F(6,32)=21.302<br><b>,P=&lt;0.0001</b>  |
| $\Psi_s$ (June 2019)       | F(3,11)=10.7141<br><b>,P=&lt;0.0001</b>  | F(2,11)=0.3355<br>,P=0.7179             | F(6,11)=1.8519<br>,P=0.1263             |
| $\Pi_0$ (June 2019)        | F(3,11)=21.5185<br><b>,P=&lt;0.0001</b>  | F(2,11)=7.5033<br><b>,P=0.0033</b>      | F(6,11)=4.9563<br><b>,P=0.0024</b>      |

597

598

**Table 4.** Bartlett's test for homogeneity of variances for all species per date at the different sites. Bold indicates significant difference.

| Parameter             | Measurement Date | Standard deviation |       |       | $\chi^2$          | Bartlett's value |
|-----------------------|------------------|--------------------|-------|-------|-------------------|------------------|
|                       |                  | MM                 | M     | SA    |                   |                  |
| $\delta^{13}\text{C}$ | Summer 2018      | 1.153              | 0.328 | 0.464 | $\chi^2(2)=2.7$   | 0.069            |
| $\Psi_{\text{PD}}$    | May 2018         | 0.374              | 0.201 | 0.922 | $\chi^2(2)=3.655$ | <b>0.026</b>     |
| $\Psi_{\text{PD}}$    | July 2018        | 0.860              | 0.894 | 1.474 | $\chi^2(2)=0.389$ | 0.687            |
| $\Psi_{\text{PD}}$    | August 2018      | 0.998              | 1.273 | 1.726 | $\chi^2(2)=1.308$ | 0.309            |
| $\Psi_{\text{PD}}$    | September 2018   | 1.308              | 1.284 | 1.731 | $\chi^2(2)=0.2$   | 0.819            |

599

600

**Table 5.** Bartlett's test for homogeneity of variances for all species per site at the different dates. Bold indicates significant difference.

| Parameter          | Site | Standard deviation |       |        |           | $\chi^2$          | Bartlett's value |
|--------------------|------|--------------------|-------|--------|-----------|-------------------|------------------|
|                    |      | May                | July  | August | September |                   |                  |
| $\Psi_{\text{PD}}$ | SA   | 0.922              | 1.474 | 1.726  | 1.731     | $\chi^2(3)=0.532$ | 0.660            |
| $\Psi_{\text{PD}}$ | M    | 0.201              | 0.894 | 1.273  | 1.284     | $\chi^2(3)=3.092$ | <b>0.026</b>     |
| $\Psi_{\text{PD}}$ | MM   | 0.374              | 0.860 | 0.998  | 1.308     | $\chi^2(3)=1.139$ | 0.332            |

601

602



603 **References**

- 604 **Ackerly DD. 2004.** Adaptation, niche conservatism, and convergence: Comparative  
605 studies of leaf evolution in the California Chaparral. *Ecological Monographs* **163**:  
606 654–671.
- 607 **Adams HD, Zeppel MJB, Anderegg WRL, Hartmann H, Landhäusser SM,**  
608 **Tissue DT, Huxman TE, Hudson PJ, Franz TE, Allen CD, et al. 2017.** A multi-  
609 species synthesis of physiological mechanisms in drought-induced tree mortality.  
610 *Nature Ecology and Evolution* **1**: 1285–1291.
- 611 **Álvarez S, Rodríguez P, Broetto F, Sánchez-Blanco MJ. 2018.** Long term  
612 responses and adaptive strategies of *Pistacia lentiscus* under moderate and severe  
613 deficit irrigation and salinity: Osmotic and elastic adjustment, growth, ion uptake and  
614 photosynthetic activity. *Agricultural Water Management* **202**: 253–262.
- 615 **Anderegg WRL. 2015.** Spatial and temporal variation in plant hydraulic traits and  
616 their relevance for climate change impacts on vegetation. *New Phytologist* **205**: 1008–  
617 1014.
- 618 **Anderegg WRL, Klein T, Bartlett M, Sack L, Pellegrini AFA, Choat B, Jansen S.**  
619 **2016.** Meta-analysis reveals that hydraulic traits explain cross-species patterns of  
620 drought-induced tree mortality across the globe. *Proceedings of the National*  
621 *Academy of Sciences* **113**: 5024–5029.
- 622 **Aranda I, Cadahía E, Fernández De Simón B. 2020.** Specific leaf metabolic  
623 changes that underlie adjustment of osmotic potential in response to drought by four  
624 *Quercus* species. *Tree Physiology* **41**: 728–743.
- 625 **Bartlett MK, Klein T, Jansen S, Choat B, Sack L. 2016.** The correlations and  
626 sequence of plant stomatal, hydraulic, and wilting responses to drought. *Proceedings of*  
627 *the National Academy of Sciences* **113**: 13098-13103
- 628 **Bartlett MK, Scoffoni C, Sack L. 2012.** The determinants of leaf turgor loss point  
629 and prediction of drought tolerance of species and biomes: a global meta-analysis.  
630 *Ecology Letters* **15**: 393–405.
- 631 **Benito Garzón M, González Muñoz N, Wigneron J-P, Moisy C, Fernández-**  
632 **Manjarrés J, Delzon S. 2018.** The legacy of water deficit on populations having  
633 experienced negative hydraulic safety margin. *Global Ecology and Biogeography* **27**:  
634 346-356.
- 635 **Bittencourt PRL, Oliveira RS, da Costa ACL, Giles AL, Coughlin I, Costa PB,**  
636 **Bartholomew DC, Ferreira LV, Vasconcelos SS, Barros FV, et al. 2020.**  
637 Amazonia trees have limited capacity to acclimate plant hydraulic properties in  
638 response to long-term drought. *Global Change Biology* **26**: 3569-3584.
- 639 **Canadell, J., R. B. Jackson, J. R. Ehleringer, H. A. Mooney, O. E. Sala and E.-D.**  
640 **Schulze 1996.** Maximum rooting depth of vegetation types at the global scale.  
641 *Oecologia*, 108: 583-595.
- 642 **Cernusak LA, Ubierna N, Winter K, Holtum JAM, Marshall JD, Farquhar GD.**  
643 **2013.** Environmental and physiological determinants of carbon isotope discrimination  
644 in terrestrial plants. *New Phytologist* **200**: 950–965.
- 645 **Chirino E, Bellot J, Sánchez JR. 2011.** Daily sap flow rate as an indicator of  
646 drought avoidance mechanisms in five Mediterranean perennial species in semi-arid

- 647 southeastern Spain. *Trees* **25**: 593–606.
- 648 **Choat B, Sack L, Holbrook NM. 2007.** Diversity of hydraulic traits in nine *Cordia*  
649 species growing in tropical forests with contrasting precipitation. *New Phytol* **175**:  
650 686–698.
- 651 **Choat B, Jansen S, Brodribb TJ, Cochard H, Delzon S, Bhaskar R, Bucci SJ,**  
652 **Feild TS, Gleason SM, Hacke UG, et al. 2012.** Global convergence in the  
653 vulnerability of forests to drought. *Nature* **491**: 752–755.
- 654 **Cochard H, Damour G, Bodet C, Tharwat I, Poirier M, Améglio, T. 2005.**  
655 Evaluation of a new centrifuge technique for rapid generation of xylem vulnerability  
656 curves. *Physiol. Plant.* **124**: 410–418.
- 657 **Cramer W, Guiot J, Fader M, Garrabou J, Gattuso J-P, Iglesias A, Lange MA,**  
658 **Lionello P, Llasat MC, Paz S, et al. 2018.** Climate change and interconnected risks  
659 to sustainable development in the Mediterranean. *Nature Climate Change* **8**: 972–980.
- 660 **Creek D, Lamarque LJ, Torres-Ruiz JM, Parise C, Burlett R, Tissue DT, Delzon**  
661 **S. 2020.** Xylem embolism in leaves does not occur with open stomata: evidence from  
662 direct observations using the optical visualization technique. *Journal of Experimental*  
663 *Botany* **71**: 1151–1159.
- 664 **Crombie D, Tippett J, Hill T. 1988.** Dawn water potential and root depth of trees  
665 and understorey species in Southwestern Australia. *Australian Journal of Botany* **36**:  
666 621–631.
- 667 **Danin A, Plitmann U. 1987.** Revision of the plant geographical territories of Israel  
668 and Sinai. *Plant Systematics and Evolution* **156**: 43–53.
- 669 **Dawson TE, Mambelli S, Plamboeck AH, Templer PH, Tu KP. 2002.** Stable  
670 Isotopes in Plant Ecology. *Annual Review of Ecology and Systematics* **33**: 507–559.
- 671 **Deligö A, Bayar E. 2018.** Drought stress responses of seedlings of two oak species  
672 (*Quercus cerris* and *Quercus robur*). *Turkish Journal of Agriculture and Forestry* **42**:  
673 114–123.
- 674 **Delzon S. 2015.** New insight into leaf drought tolerance. *Functional Ecology* **29**:  
675 1247–1249.
- 676 **Delzon S, Douthe C, Sala A, Cochard H. 2010.** Mechanism of water-stress induced  
677 cavitation in conifers: Bordered pit structure and function support the hypothesis of  
678 seal capillary-seeding. *Plant, Cell and Environment* **33**: 2101–2111.
- 679 **Farquhar GD, Ehleringer JR, Hubick KT. 1989.** Carbon isotope discrimination  
680 and photosynthesis. *Annu Rev Plant Physiol Plant Mol Biol* **40**: 503–537.
- 681 **Feng X, Ackerly DD, Dawson TE, Manzoni S, McLaughlin B, Skelton RP, Vico**  
682 **G, Weitz AP, Thompson SE. 2019.** Beyond isohydricity: The role of environmental  
683 variability in determining plant drought responses. *Plant Cell and Environment* **42**:  
684 1104–1111.
- 685 **Fontes CG, Dawson TE, Jardine K, McDowell N, Gimenez BO, Anderegg L,**  
686 **Negrón-Juárez R, Higuchi N, Fine PVA, Araújo AC, et al. 2018.** Dry and hot: the  
687 hydraulic consequences of a climate change-type drought for Amazonian trees.  
688 *Philosophical Transactions of the Royal Society B: Biological Sciences* **373**:  
689 20180209.

- 690 **Forner A, Valladares F, Aranda I. 2018a.** Mediterranean trees coping with severe  
691 drought: Avoidance might not be safe. *Environmental and Experimental Botany* **155**:  
692 529–540.
- 693 **Forner A, Valladares F, Bonal D, Granier A, Grossiord C, Aranda I. 2018b.**  
694 Extreme droughts affecting Mediterranean tree species' growth and water-use  
695 efficiency: the importance of timing. *Tree Physiology* **38**: 1127–1137.
- 696 **García de la Serrana R, Vilagrosa A, Alloza JA. 2015.** Pine mortality in southeast  
697 Spain after an extreme dry and warm year: interactions among drought stress,  
698 carbohydrates and bark beetle attack. *Trees* **29**: 1791–1804.
- 699 **Gazol A, Sangüesa-Barreda G, Granda E, Camarero JJ. 2017.** Tracking the  
700 impact of drought on functionally different woody plants in a Mediterranean  
701 scrubland ecosystem. *Plant Ecology* **218**: 1009–1020.
- 702 **González-Muñoz N, Sterck F, Torres-Ruiz JM, Petit G, Cochard H, von Arx G,  
703 Lintunen A, Caldeira MC, Capdeville G, Copini P, et al. 2018.** Quantifying in situ  
704 phenotypic variability in the hydraulic properties of four tree species across their  
705 distribution range in Europe. *PLoS ONE* **13**: e0196075.
- 706 **Jakoby G, Rog I, Shtein I, Chashmonay I, Ben-Yosef D, Eshel A, Klein T. 2021.**  
707 Tree Forensics: Modern DNA barcoding and traditional anatomy identify roots  
708 threatening an ancient necropolis. *PLANTS, PEOPLE, PLANET* **3**: 211-219.
- 709 **Johnson DM, Domec J-C, Carter Berry Z, Schwantes AM, McCulloh KA,  
710 Woodruff DR, Wayne Polley H, Wortemann R, Swenson JJ, Scott Mackay D, et  
711 al. 2018.** Co-occurring woody species have diverse hydraulic strategies and mortality  
712 rates during an extreme drought. *Plant, Cell & Environment* **41**: 576-588.
- 713 **Johnson DM, McCulloh KA, Meinzer FC, Woodruff DR, Eissenstat DM, Phillips  
714 N. 2011.** Hydraulic patterns and safety margins, from stem to stomata, in three eastern  
715 US tree species. *Tree Physiology* **31**: 659-668.
- 716 **Kolb KJ, Sperry JS. 1999.** Differences in drought adaptation between subspecies of  
717 sagebrush (*Artemisia tridentata*). *Ecology* **80**: 2373-2384.
- 718 **Li X, Blackman CJ, Choat B, Medlyn BE, Rymer PD, Tissue DT. 2019.** Drought  
719 tolerance traits do not vary across sites differing in water availability in *Banksia*  
720 *serrata* (Proteaceae). *Functional plant biology* : FPB **46**: 624-633.
- 721 **Lo Gullo MA, Salleo S. 1988.** Different strategies of drought resistance in three  
722 Mediterranean sclerophyllous trees growing in the same environmental conditions.  
723 *New Phytologist* **108**: 267–276.
- 724 **Lobo A, Torres-Ruiz JM, Burlett R, Lemaire C, Parise C, Francioni C, Truffaut  
725 L, Tomášková I, Hansen JK, Kjær ED, et al. 2018.** Assessing inter- and  
726 intraspecific variability of xylem vulnerability to embolism in oaks. *Forest Ecology  
727 and Management* **424**: 53-61
- 728 **Guo JS, Hultine KR, Koch GW, Kropp H, Ogle K. 2020.** Temporal shifts in  
729 iso/anisohydry revealed from daily observations of plant water potential in a dominant  
730 desert shrub. *New Phytologist* **225**: 713–726.
- 731 **Jacobsen AL, Pratt RB, Davis SD, Tobin MF. 2014.** Geographic and seasonal  
732 variation in Chaparral vulnerability to cavitation. *Madroño* **61**: 317–327.
- 733 **Klein T, Shpringer I, Fikler B, Elbaz G, Cohen S, Yakir D. 2013.** Relationships

- 734 between stomatal regulation, water-use, and water-use efficiency of two coexisting  
735 key Mediterranean tree species. *Forest Ecology and Management* **302**: 34–42.
- 736 **Lamy J-B, Delzon S, Bouche PS, Alia R, Vendramin GG, Cochard H, Plomion C.**  
737 **2014.** Limited genetic variability and phenotypic plasticity detected for cavitation  
738 resistance in a Mediterranean pine. *New Phytologist* **201**(3): 874–886.
- 739 **Larter M, Brodribb TJ, Pfautsch S, Burlett R, Cochard H, Delzon S. 2015.**  
740 Extreme aridity pushes trees to their physical limits. *Plant Physiology* **168**: 804–807.
- 741 **Larter M, Pfautsch S, Domec J-C, Trueba S, Nagalingum N, Delzon S. 2017.**  
742 Aridity drove the evolution of extreme embolism resistance and the radiation  
743 of conifer genus *Callitris*. *New Phytologist* **215**: 97–112.
- 744 **Liu C, Liu Y, Guo K, Fan D, Li G, Zheng Y, Yu L, Yang R. 2011.** Effect of  
745 drought on pigments, osmotic adjustment and antioxidant enzymes in six woody plant  
746 species in karst habitats of southwestern China. *Environmental and Experimental*  
747 *Botany* **71**: 174–183.
- 748 **Maherali H, Pockman WT, Jackson RB. 2004.** Adaptive variation in the  
749 vulnerability of woody plants to xylem cavitation. *Ecology* **85**: 2184–2199.
- 750 **Martin-StPaul N, Delzon S, Cochard H. 2017.** Plant resistance to drought depends  
751 on timely stomatal closure (H Maherali, Ed.). *Ecology Letters* **20**: 1437–1447.
- 752 **Martínez-Vilalta J, Cochard H, Mencuccini M, Sterck F, Herrero A, Korhonen**  
753 **JFJ, Llorens P, Nikinmaa E, Nolè A, Poyatos R, et al. 2009.** Hydraulic adjustment  
754 of Scots pine across Europe. *New Phytologist* **184**: 353–364.
- 755 **Meinzer FC, Johnson DM, Lachenbruch B, McCulloh KA, Woodruff DR. 2009.**  
756 Xylem hydraulic safety margins in woody plants: Coordination of stomatal control of  
757 xylem tension with hydraulic capacitance. *Functional Ecology* **23**: 922–930.
- 758 **Meinzer FC, Woodruff DR, Marias DE, Smith DD, McCulloh KA, Howard AR,**  
759 **Magedman AL. 2016.** Mapping ‘hydroscares’ along the iso- to anisohydric  
760 continuum of stomatal regulation of plant water status. *Ecology letters* **19**: 1343–1352.
- 761 **Mencuccini M, Minunno F, Salmon Y, Martínez-Vilalta J, Hölttä T. 2015.**  
762 Coordination of physiological traits involved in drought-induced mortality of woody  
763 plants. *New Phytologist* **208**: 396–409.
- 764 **Moreno-Gutiérrez C, Dawson TE, Nicolás E, Querejeta JI. 2012.** Isotopes reveal  
765 contrasting water use strategies among coexisting plant species in a Mediterranean  
766 ecosystem. *New Phytologist* **196**: 489–496.
- 767 **Myers N, Mittermeyer RA, Mittermeyer CG, Da Fonseca GAB, Kent J. 2000.**  
768 Biodiversity hotspots for conservation priorities. *Nature* **403**: 853–858.
- 769 **Nardini A, Casolo V, Dal Borgo A, Savi T, Stenni B, Bertoincin P, Zini L,**  
770 **McDowell NG. 2016.** Rooting depth, water relations and non-structural carbohydrate  
771 dynamics in three woody angiosperms differentially affected by an extreme summer  
772 drought. *Plant, Cell & Environment* **39**: 618–627.
- 773 **Nemera DB, Bar-Tal A, Levy GJ, Lukyanov V, Tarchitzky J, Paudel I, Cohen S.**  
774 **2020.** Mitigating negative effects of long-term treated wastewater application via soil  
775 and irrigation manipulations: Sap flow and water relations of avocado trees (*Persea*  
776 *americana* Mill.). *Agricultural Water Management* **237**: 106178.



- 777 **Palacio S, Montserrat-Martí G, Ferrio JP. 2017.** Water use segregation among  
778 plants with contrasting root depth and distribution along gypsum hills. *Journal of*  
779 *Vegetation Science* **28**: 1107–1117.
- 780 **Pammenter NW, Van der Willigen C. 1998.** A mathematical and statistical analysis  
781 of the curves illustrating vulnerability of xylem to cavitation. *Tree Physiology* **18**:  
782 589-593.
- 783 **Paudel I, Gerbi H, Wagner Y, Zisovich A, Sapir G, Brumfeld V, Klein T. 2019a.**  
784 Drought tolerance of wild versus cultivated tree species of almond and plum in the  
785 field. *Tree Physiology* **40**: 454-466.
- 786 **Paudel I, Gerbi H, Zisovich A, Sapir G, Ben-Dor S, Brumfeld V, Klein T. 2019b.**  
787 Drought tolerance mechanisms and aquaporin expression of wild vs. cultivated pear  
788 tree species in the field. *Environmental and Experimental Botany* **167**: 103832.
- 789 **Pratt RB, Jacobsen AL, Golgotiu KA, Sperry JS, Ewers FW, Davis SD. 2007.**  
790 Life history type and water stress tolerance in nine California chaparral species  
791 (Rhamnaceae). *Ecological Monographs* **77**: 239–253.
- 792 **Pratt RB, Jacobsen AL, Jacobs SM, Esler KJ. 2012.** Xylem transport safety and  
793 efficiency differ among Fynbos shrub life history types and between two sites  
794 differing in mean rainfall. *International Journal of Plant Sciences* **173**: 474–483.
- 795 **Rog I, Tague C, Jakoby G, Megidish S, Yaakobi A, Wagner Y, Klein T. 2021.**  
796 Interspecific soil water partitioning as a driver of increased productivity in a diverse  
797 mixed Mediterranean forest. *Journal of Geophysical Research: Biogeosciences* **126**:  
798 e2021JG006382
- 799 **Redtfeldt RA, Davis SD. 1996.** Physiological and morphological evidence of niche  
800 segregation between two co-occurring species of *Adenostoma* in California Chaparral.  
801 *Écoscience* **3**: 290–296.
- 802 **Rumman R, Atkin OK, Bloomfield KJ, Eamus D. 2018.** Variation in bulk-leaf <sup>13</sup>C  
803 discrimination, leaf traits and water-use efficiency–trait relationships along a  
804 continental-scale climate gradient in Australia. *Global Change Biology* **24**: 1186-  
805 1200.
- 806 **Serrano L, Peñuelas J, Romà, Robert O, Serrano SL, Peñuelas J, Ogaya R, Savé**  
807 **R. 2005.** Tissue-water relations of two co-occurring evergreen Mediterranean species  
808 in response to seasonal and experimental drought conditions. *J Plant Res* **118**: 263–  
809 269.
- 810 **Skelton RP, Dawson TE, Thompson SE, Shen Y, Weitz AP, Ackerly D. 2018.**  
811 Low vulnerability to xylem embolism in leaves and stems of North American oaks.  
812 *Plant Physiology* **177**: 1066–1077.
- 813 **Sofa A, Manfreda S, Fiorentino M, Dichio B, Xiloyannis C. 2008.** Hydrology and  
814 Earth System Sciences The olive tree: a paradigm for drought tolerance in  
815 Mediterranean climates. *Hydrology & Earth System Sciences* **12**: 293–301.
- 816 **Sparks JP, Black RA. 1999.** Regulation of water loss in populations of *Populus*  
817 *trichocarpa*: the role of stomatal control in preventing xylem cavitation. *Tree*  
818 *Physiology* **19**: 453–459.
- 819 **Spinoni J, Vogt J V, Naumann G, Barbosa P, Dosio A. 2018.** Will drought events  
820 become more frequent and severe in Europe? *International Journal of Climatology*

821 **38**: 1718–1736.

822 **Stojnić S, Suchocka M, Benito-Garzón M, Torres-Ruiz JM, Cochard H, Bolte A,**  
823 **Cocozza C, Cvjetković B, de Luis M, Martínez-Vilalta J, et al. 2017.** Variation in  
824 xylem vulnerability to embolism in European beech from geographically marginal  
825 populations. *Tree Physiology* 38: 173–185.

826 **Tielbörger K, Bilton MC, Metz J, Kigel J, Holzapfel C, Lebrija-Trejos E,**  
827 **Konsens I, Parag HA, Sternberg M. 2014.** Middle-Eastern plant communities  
828 tolerate 9 years of drought in a multi-site climate manipulation experiment. *Nat*  
829 *Commun* 5: 5102.

830 **Toumi L, Lumaret R. 2010.** Genetic variation and evolutionary history of holly oak:  
831 a circum-Mediterranean species-complex [*Quercus coccifera* L./*Q. calliprinos*  
832 (Webb) Holmboe, Fagaceae]. *Plant Systematics and Evolution* **290**: 159–171.

833 **Trumbore S, Brando P, Hartmann H. 2015.** Forest health and global change.  
834 *Science* **349**: 814–818.

835 **Tyree MT, Sperry JS. 1989.** Vulnerability of xylem to cavitation and embolism.  
836 *Annual Review of Plant Physiology and Plant Molecular Biology* **40**: 19–36.

837 **Tyree MT, Zimmermann MH. 1983.** *Xylem structure and the ascent of sap.*  
838 New York, NY: Springer.

839 **Väänänen PJ, Osem Y, Cohen S, Grünzweig JM. 2019.** Differential drought  
840 resistance strategies of co-existing woodland species enduring the long rainless  
841 Eastern Mediterranean summer. *Tree Physiology* **4**: 305–320.

842 **Volaire F. 2018.** A unified framework of plant adaptive strategies to drought:  
843 Crossing scales and disciplines. *Global Change Biology* **24**: 2929–2938.

844 **Wortemann R, Herbette S, Barigah TS, Fumanal B, Alia R, Ducouso A,**  
845 **Gomory D, Roeckel-Drevet P, Cochard H. 2011.** Genotypic variability and  
846 phenotypic plasticity of cavitation resistance in *Fagus sylvatica* L. across Europe.  
847 *Tree Physiology* **31**: 1175–1182.

848 **Xu C, McDowell NG, Fisher RA, Wei L, Sevanto S, Christoffersen BO, Weng E,**  
849 **Middleton RS. 2019.** Increasing impacts of extreme droughts on vegetation  
850 productivity under climate change. *Nature Climate Change* **9**: 948–953.

851 **Ziegler C, Coste S, Stahl C, Delzon S, Levionnois S, Cazal J, Cochard H,**  
852 **Esquivel-Muelbert A, Goret J-Y, Heuret P, et al. 2019.** Large hydraulic safety  
853 margins protect Neotropical canopy rainforest tree species against hydraulic failure  
854 during drought. *Annals of Forest Science* **76**: 115.

855

856

857

858

859

860

861

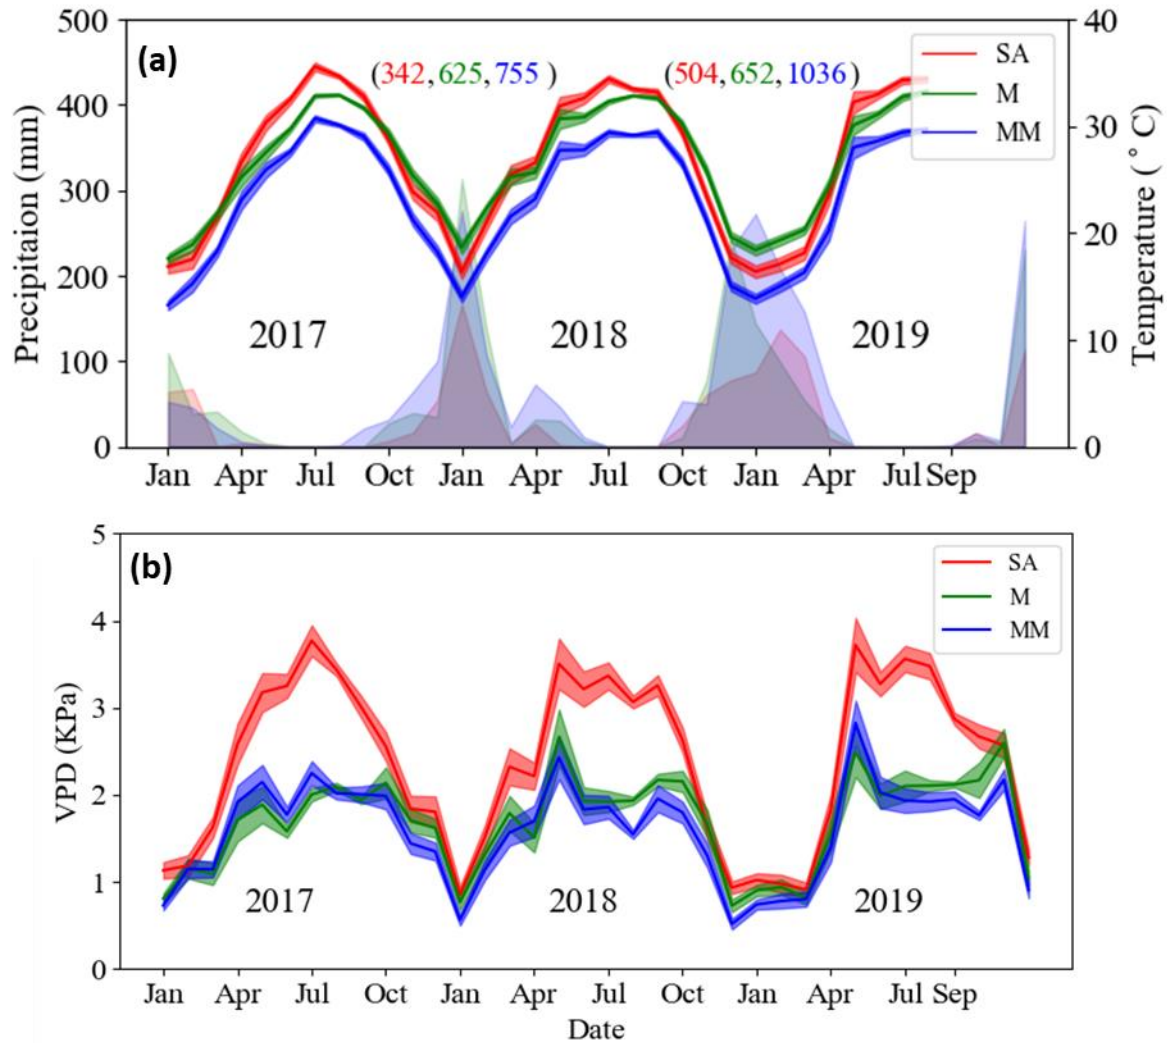

862

863 **Fig. 1:** Meteorological data from the three study sites. (a) Monthly average daily  
864 maximum temperature and monthly precipitation. Numbers in brackets represent the  
865 annual precipitation for 2 consecutive winters (2017-2018, 2018-2019, calculated  
866 from September to September) for the SA (red), M (green), and MM (blue) sites,  
867 respectively. (b) Monthly average daily maximum vapor pressure deficit (VPD). Line  
868 shadow represents standard error.

869

870



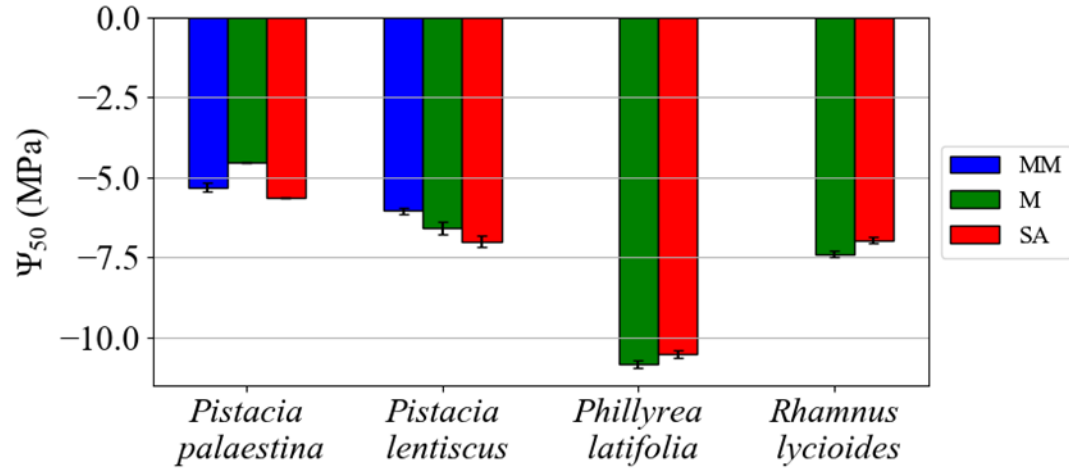

871

872 **Fig. 2:**  $\Psi_{50}$  at the three sites (MM, Mesic-Mediterranean; M, Mediterranean; SA,  
873 Semi-arid). *Quercus calliprinos* was not measured due to excessive vessel length.  
874 Differences between species were significant, but no significant differences were  
875 observed between sites. Error bars indicate standard error (n = 5-7).

876

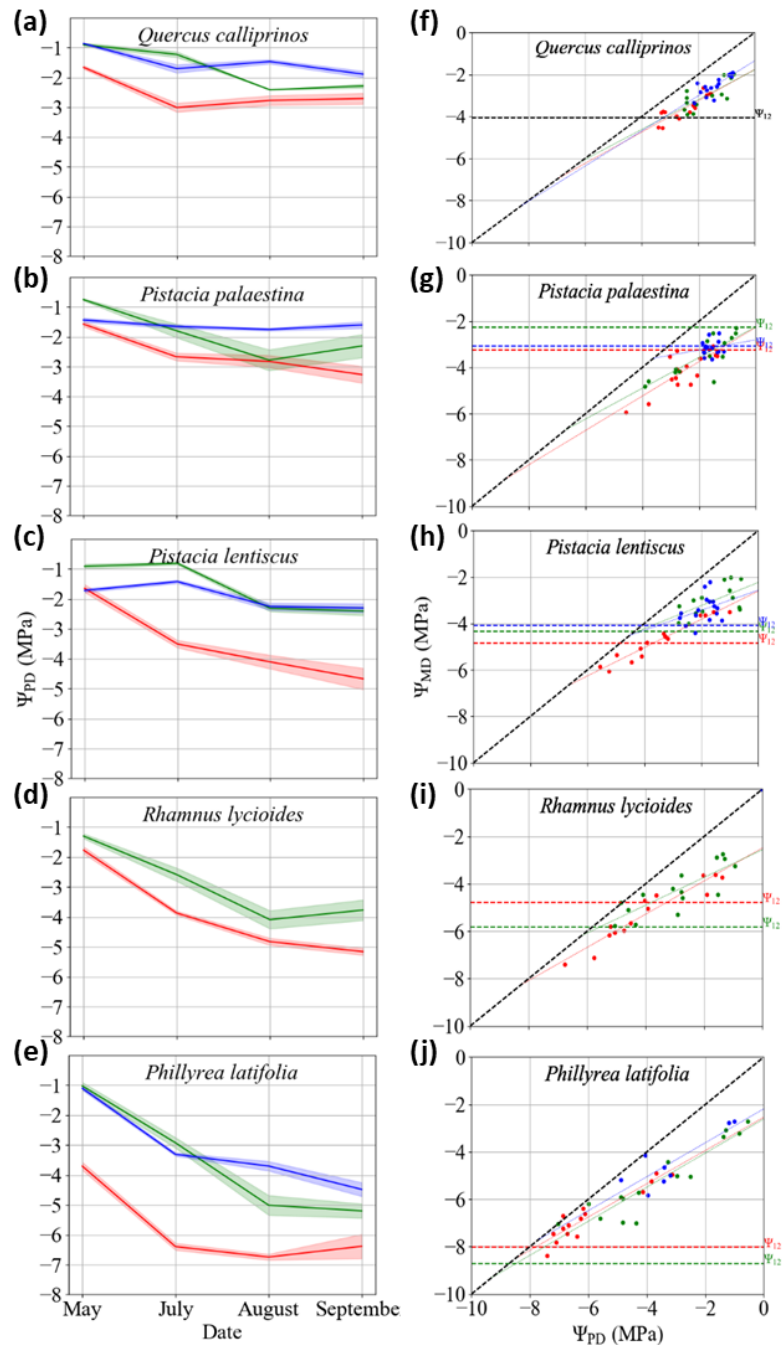

877

878 **Fig. 3:** Leaf water potential values during the dry season of 2018 at the Mesic-  
 879 Mediterranean (blue), Mediterranean (green), and Semi-arid (red) study sites. **a-e**;  
 880 Courses of predawn leaf water potential for each species. Line shadow represents  
 881 standard error. **f-j**, Midday water potential ( $\Psi_{MD}$ ) vs. predawn water potential ( $\Psi_{PD}$ )  
 882 for all species during the dry season. Each point on a plot is the average of two twigs.  
 883 Regression parameters can be found in Table S3. Thick dashed black line represents  
 884 1:1 ratio. The thin colored lines are the regressions of all points of each site. Vertical  
 885 dashed lines indicate the point of incipient embolism ( $\Psi_{12}$ ) values for the MM (blue),  
 886 M (green), and SA (red) sites. Vertical dashed black line in **f** indicate point of  
 887 incipient embolism based on *Q. coccifera* data (see Material and Methods section).

888

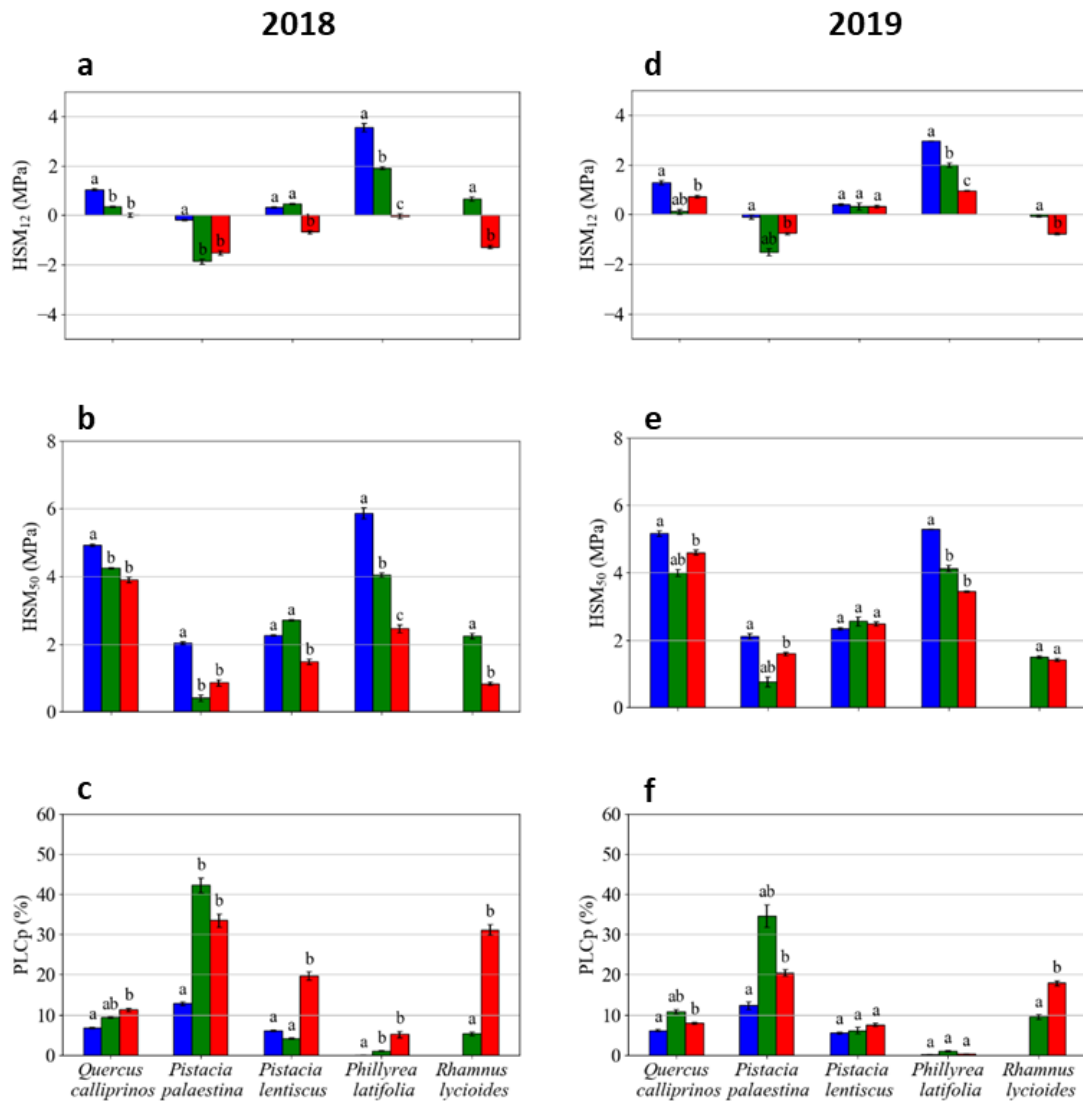

889

890 **Fig. 4:** HSM- Hydraulic safety margins (HSM12 and HSM50) and PLCp (% of  
 891 predicted embolism) for all species at the different sites, a-c represent 2018 data, d-f  
 892 represent 2019 data. MM, Mesic-Mediterranean; M, Mediterranean; SA, Semi-arid.  
 893 Different lowercase letters denote significant differences among sites. HSMs of QC  
 894 are based on the PLC curve of *Q. coccifera* (See Material and Methods).

895

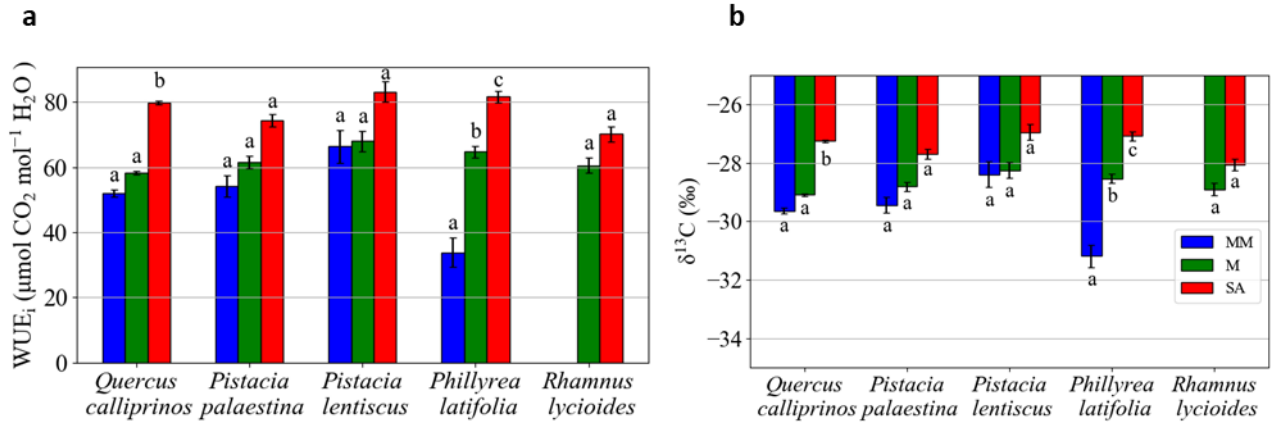

896

897 **Fig. 5:** Leaf  $\delta^{13}\text{C}$  (a) and the derived  $\text{WUE}_i$  (b) of the leaves of five species at the  
898 study sites at the end of the dry season. MM, Mesic-Mediterranean; M,  
899 Mediterranean; SA, Semi-arid. Different lowercase letters denote significant  
900 differences among sites.

901

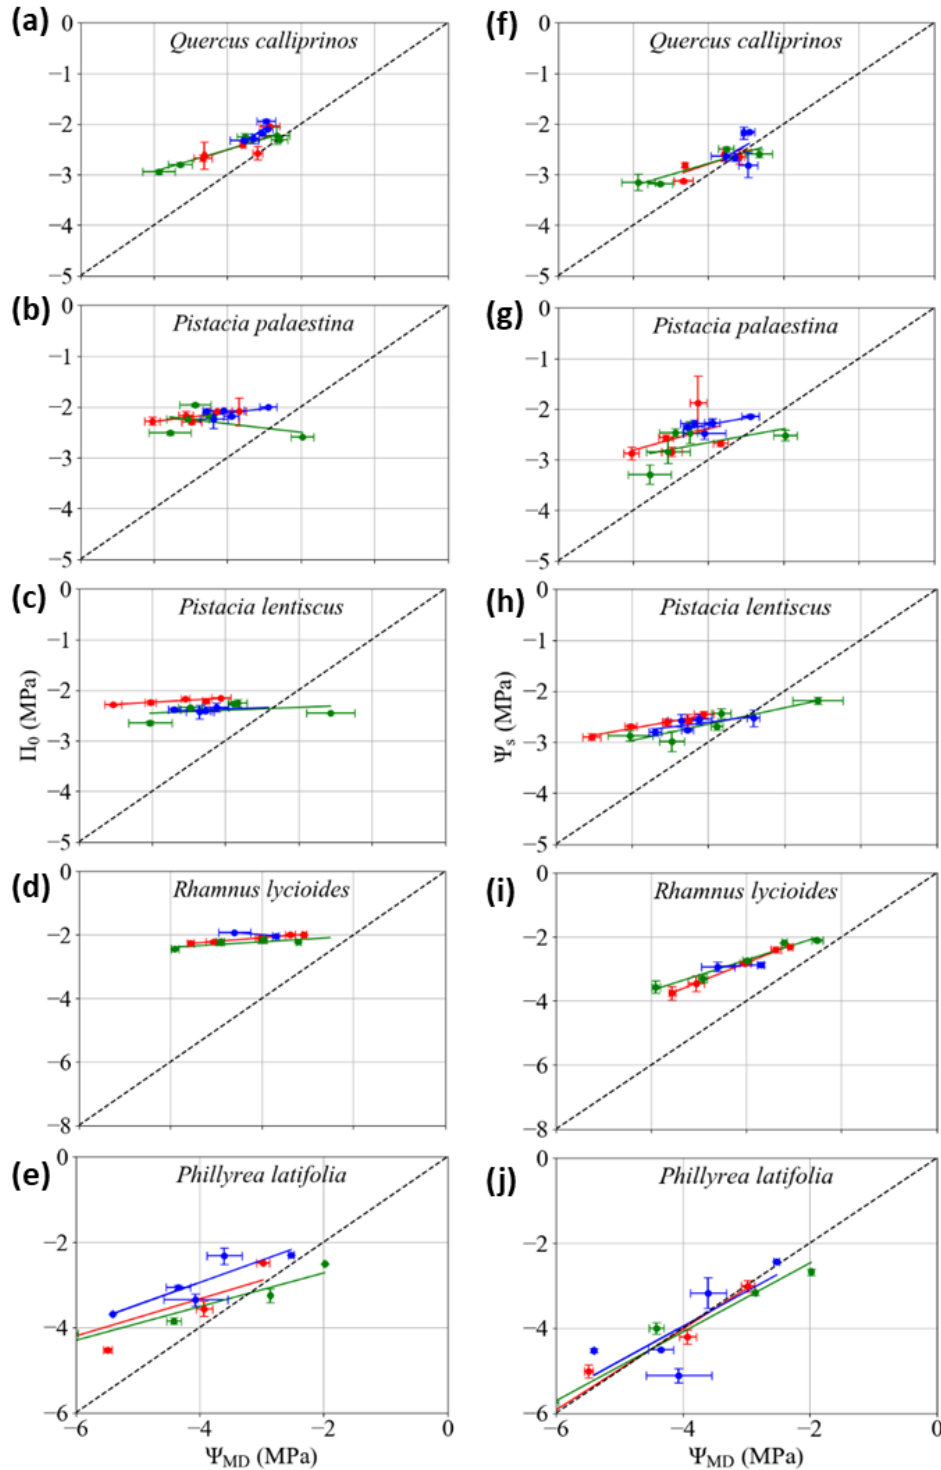

902

903 Fig. 6: Osmotic potential and leaf water potential for all species measured in summer  
904 2019 at the Mesic-Mediterranean (blue), Mediterranean (green), and Semi-arid (red)  
905 sites. **a-e**: Leaf water potential at midday ( $\Psi_{MD}$ ) vs. osmotic potential at full turgor  
906 ( $\Pi_0$ ). **f-j**, Leaf water potential at midday ( $\Psi_{MD}$ ) vs. native osmotic potential ( $\Psi_s$ ).  
907 Regression parameters can be found in Supporting Information Table S10.

908

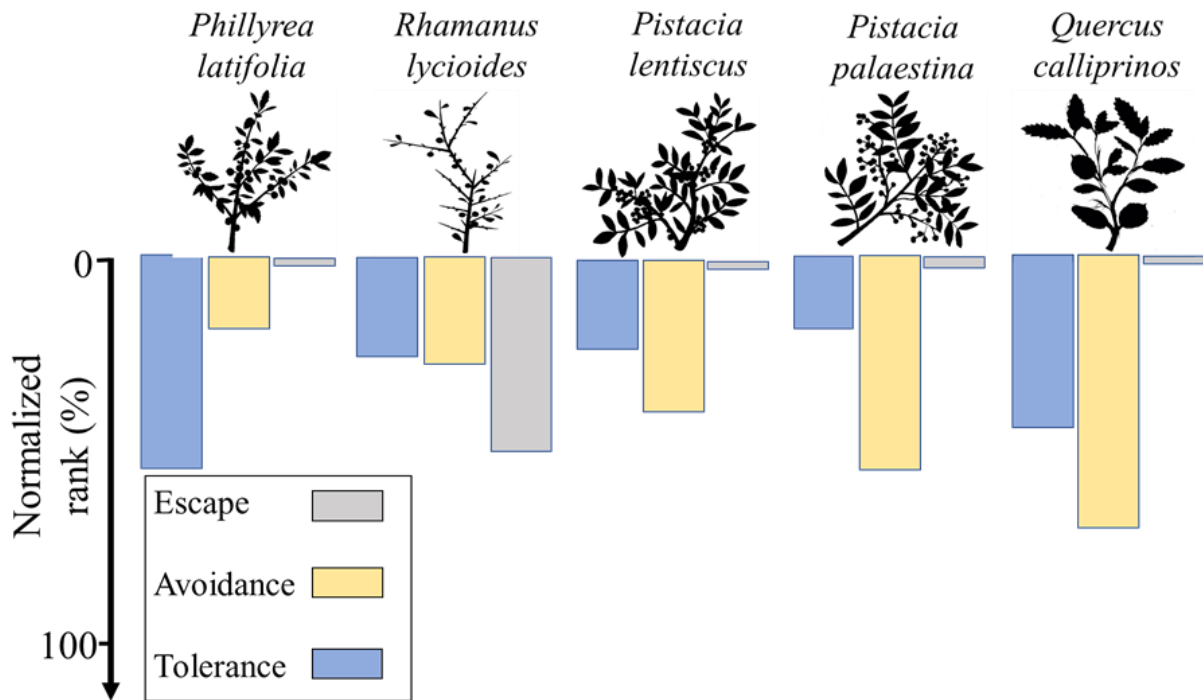

909

910 Fig. 7: A superposition for the three different drought-resistance strategies (Tolerance,  
911 Avoidance, and Escape) for a species, evaluated as normal parameters (scaled from 0  
912 to 100%) derived from measured parameters. Detailed evaluations are presented in  
913 Supporting Information Table S19. Drawing by Ilana Stein.

914

915

916 **Supporting Information**

- 917 Table **S1**:  $\Psi_{50}$ ,  $\Psi_{\min}$  and safety margins measured for the different species at the  
918 different sites in summer 2018.
- 919 Table **S2**:  $\Psi_{50}$ ,  $\Psi_{\min}$  and safety margins measured for the different species at the  
920 different sites in summer 2019.
- 921 Table **S3**:  $\Psi_{12}$ ,  $\Psi_{\min}$  and safety margins measured for the different species at the  
922 different sites in summer 2018.
- 923 Table **S4**:  $\Psi_{12}$ ,  $\Psi_{\min}$  and safety margins measured for the different species at the  
924 different sites in summer 2019.
- 925 Table **S5**:  $\Psi_{88}$ ,  $\Psi_{\min}$  and safety margins measured for the different species at the  
926 different sites in summer 2018.
- 927 Table **S6**:  $\Psi_{88}$ ,  $\Psi_{\min}$  and safety margins measured for the different species at the  
928 different sites in summer 2019.
- 929 Table **S7**:  $\Psi_{PD}$  ANOVA analysis between sites per species per measurement date.
- 930 Table **S8**: Parameters for the linear regression of  $\Psi_{MD}$  vs.  $\Psi_{PD}$  for different species at  
931 different sites.
- 932 Table **S9**: Parameters for the linear regression of  $\Psi_{MD}$  vs.  $\Psi_{PD}$  for different species.
- 933 Table **S10**: Parameters correspond to  $\Psi_{MD}$  vs.  $\Pi_0$ , in all species at all sites.
- 934 Table **S11**:  $\Psi_{PD}$  ANOVA analysis between species per site per measurement date.
- 935 Table **S12**:  $\Psi_{MD}$  ANOVA analysis between species per site per measurement date.
- 936 Table **S13**:  $\delta^{13}C$  ANOVA analysis between species per site per measurement date.
- 937 Table **S14**: Summary of Covariance analysis testing influence of  $\Psi_{MD}$ , site and  $\Psi_{MD} \times$   
938 site on  $\Psi_S$
- 939 Table **S15**: Summary of Covariance analysis testing influence of  $\Psi_{MD}$ , site, and  $\Psi_{MD}$   
940  $\times$  site, on  $\Pi_0$
- 941 Table **S16**: Summary of Covariance analysis testing influence of  $\Psi_{MD}$ , species and  
942 their interaction on  $\Pi_0$
- 943 Table **S17**: Summary of Covariance analysis testing influence of  $\Psi_{MD}$ , species and  
944 their interaction on  $\Psi_S$ .
- 945 Table **S18**: Parameters correspond to  $\Psi_{PD}$  slopes analysis in all species at all sites.
- 946 Table **S19**: Measured and normalized parameters correspond to Fig. 7.
- 947
